# Supplementary material for: BcMYB111 Responds to BcCBF2 and Induces Flavonol Biosynthesis to Enhance Tolerance under Cold Stress in Non-Heading Chinese Cabbage
Source: MDPI journal article supplement (doi:10.3390/ijms24108670), 2023-05-12
Supplement: s1 [file s1]

Supplementary Table S1 -Identification, quantification and annotation for metabolites of T0 and T1

| index   | T0-1     | T0-2     | T0-3     | T0-4     | T0-5     | T0-6     | T1-1     | T1-2     | T1-3     | T1-4     | control_n | MS2 name  | MS1 name  | mz       | Cloud     | RT [min]        | Molecular Formula     | CAS                | Appm                             | -        | C_ID     | Pathway  | KEGG_B      | KEGG_A         | class           |                                                                                                    |                                 |            |
|---------|----------|----------|----------|----------|----------|----------|----------|----------|----------|----------|-----------|-----------|-----------|----------|-----------|-----------------|-----------------------|--------------------|----------------------------------|----------|----------|----------|-------------|----------------|-----------------|----------------------------------------------------------------------------------------------------|---------------------------------|------------|
| NEG0000 | 731.0619 | 320.9292 | 635.7339 | 637.0337 | 132.1392 | 304.9866 | 767.8762 | 595.7486 | 595.4935 | 743.2116 | 654.9647  | 802.6902  | 460.3141  | 693.3308 | 0.590925  | 0.049972        | 0.068885              | 0.558132           | Glycolic acid                    | 96.829   | 76.01421 | C2H4O3   | 79-14-1     | 24 Hydroxy     | C00160          | ko01100/ CarbohydrateMetabolism                                                                    |                                 |            |
| NEG0000 | 683.917  | 74510    | 77537.07 | 59282.47 | 70497.59 | 78686.56 | 72163.04 | 70469    | 84852.42 | 67766.95 | 80604.33  | 92618.07  | 711.2823  | 78084.97 | 0.133487  | 0.183909        | 0.22034               | 2.866921           | Pyruvate                         | 96.829   | 76.01421 | C2H4O3   | 127-17-3    | 19 Keto acid   | C00022          | ko01100/ Amino acid Human Diseases;Metabolism                                                      |                                 |            |
| NEG0000 | 297.5743 | 13.02077 | 2486.069 | 248.7477 | 8.550722 | 293.2841 | 258.5615 | 276.5405 | 234.6932 | 405.4603 | 850.1639  | 691.1899  | 71.0743   | 480.3375 | 0.132891  | 0.094335        | 0.128184              | 0.071723           | Lactic acid L-(+)-Lact           | 99.6     | 14.365   | 90.02995 | C3H6O3      | 50-21-5        | 18 Hydroxy -    | -                                                                                                  |                                 |            |
| NEG0000 | 11486.14 | 4391.525 | 10416.29 | 8862.845 | 10409.18 | 6507.202 | 6919.776 | 5059.186 | 5410.908 | 7455.936 | 10942.16  | 10097.785 | 860.365   | 7641.277 | -0.19479  | 0.46241         | 0.496278              | 0.581337           | Sulfuric acid                    | 1.054    | 97.9666  | H2SO4    | 7664-93-9   | 7 -            | C00059          | ko01100/ Amino acid Environmental Information Processing;Metabolism                                |                                 |            |
| NEG0000 | 665.8937 | 453.1285 | 455.5463 | 333.3244 | 686.1867 | 512.4626 | 405.8253 | 613.4826 | 474.3469 | 264.6227 | 293.1457  | 272.7034  | 517.757   | 384.5211 | -0.19479  | 0.1259          | 0.179791              | 0.366385           | Phosphoric acid                  | 0.937    | 97.97509 | H3PO4    | 7664-38-2   | 18 Non-met-    | C00009          | ko01100/ Energy m Environmental Information Processing;Metabolism                                  |                                 |            |
| NEG0000 | 31.64964 | 15.20255 | 26.8057  | 22.674   | 14.07441 | 16.68754 | 21.03821 | 13.09207 | 11.13363 | 13.75373 | 28.01928  | 15.32142  | 21.8828   | 17.09922 | -0.31226  | 0.312485        | 0.0394                | 0.043138           | Succinic anhydride               | 1.237    | 100.0143 | C4H4O3   | 108-30-5    | 17 Oxolanes -  | -               | -                                                                                                  |                                 |            |
| NEG0000 | 311.2677 | 276.3947 | 399.9924 | 279.9043 | 171.7781 | 291.0095 | 424.11   | 401.5449 | 350.5039 | 416.5136 | 516.6937  | 420.058   | 283.3745  | 421.629  | 0.057324  | 0.000413        | 0.00416               | 0.509895           | 2-Ketobutyrate D-Oxobuty         | 90.4     | 1.264    | 102.0299 | C4H6O5      | 600-18-0       | 17 Keto acid    | C00109                                                                                             | ko01100/ Amino acid Metabolism  |            |
| NEG0000 | 128.997  | 167.8752 | 149.8552 | 139.3614 | 173.8963 | 175.1639 | 315.7282 | 342.946  | 327.5367 | 248.8642 | 391.1843  | 438.9786  | 155.825   | 333.367  | 0.139823  | 0.086705        | 0.07209               | 0.652528           | Malonic acid                     | 0.941    | 104.0892 | C3H4O4   | 141-82-2    | 16 Carboxyl    | C00083          | ko00240/ Metabolism;Metabolism                                                                     |                                 |            |
| NEG0000 | 399.4893 | 284.4863 | 354.7202 | 269.2611 | 261.5547 | 338.3396 | 305.1984 | 315.3849 | 279.9414 | 207.3707 | 309.3656  | 405.2851  | 138.0603  | 303.5912 | -0.08717  | 0.048269        | 0.071474              | 0.018357           | Glycolic acid (2R)-2,3-D         | 73.9     | 1.877    | 102.0248 | C3H6O4      | 473-81-4       | 17 Organoos     | C00258                                                                                             | ko01100/ Amino acid Metabolism  |            |
| NEG0000 | 1117.816 | 391.9286 | 397.9824 | 782.2864 | 744.082  | 761.8086 | 587.9008 | 538.2317 | 716.7672 | 444.9921 | 912.06    | 698.9788  | 0.38383   | 15.05433 | 0.183701  | 0.449094        | 2-Furonic acid        | 69.1               | 127.0213                         | 99.619   | 102.0143 | C5H4O3   | 88-14-2     | 15 Furans      | C01546          | ko0120/ Global                                                                                     | metabolism                      |            |
| NEG0000 | 12.82926 | 12.82037 | 20.35758 | 16.29855 | 57.11546 | 13.33565 | 94.67912 | 31.15946 | 36.01139 | 30.70068 | 59.53301  | 33.82603  | 10.38883  | 47.65121 | 1.810092  | 0.009179        | 0.015969              | 0.256507           | Uracil                           | 89.9     | 1.237    | 102.0255 | C4H4N2O2    | 66-22-8        | 15 Diazines     | C00106                                                                                             | ko01100/ Global                 | metabolism |
| NEG0000 | 6.625987 | 9.977318 | 11.58793 | 9.83395  | 7.20511  | 14.89009 | 134.8814 | 162.2558 | 141.4874 | 249.0708 | 152.8899  | 217.0853  | 10.1244   | 13.9413  | 0.00645   | 0.4886705       | 0.575665              | L-Proline          | 86.4                             | 0.837    | 151.0615 | C5H9NO2  | 147-85-3    | 15 Carboxyl    | C00148          | ko01100/ Amino acid Environmental Information Processing;Genetic Information Processing;Metabolism |                                 |            |
| NEG0000 | 659.8666 | 981.2837 | 883.1646 | 679.7339 | 823.73   | 1227.903 | 1019.518 | 564.2551 | 929.0646 | 518.2965 | 882.6469  | 1031.606  | 87.947    | 824.2343 | -0.08779  | 0.691185        | 0.020739              | 0.051093           | Leucic acid                      | 1.182    | 116.0092 | C4H8O4   | 110-16-7    | 15 Carboxyl    | C001384         | ko01120/ Amino acid Metabolism                                                                     |                                 |            |
| NEG0000 | 39.77975 | 21.06836 | 45.7647  | 39.7966  | 23.89408 | 23.75837 | 95.22046 | 79.52882 | 57.10687 | 79.06313 | 83.16241  | 100.6406  | 32.9445   | 35.3082  | 0.549E-05 | 0.071026        | 0.031909              | Maleic anhydride   | 86.4                             | 1.297    | 116.0416 | C5H4O3   | 123-72-6    | 15 Keto acid - | -               | -                                                                                                  |                                 |            |
| NEG0000 | 164.8674 | 71.63453 | 178.936  | 123.1272 | 11.10759 | 86.99467 | 22.66817 | 41.57861 | 39.53432 | 42.39365 | 36.43446  | 58.37693  | 106.1291  | 40.16436 | -1.4017   | 0.029546        | 0.047939              | 0.311314           | Succinic acid                    | 1.336    | 118.0249 | C4H6O4   | 110-15-6    | 14 Carboxyl    | C000442         | ko01100/ Amino acid Metabolism                                                                     |                                 |            |
| NEG0000 | 22.89941 | 47.91498 | 82.59718 | 60.92622 | 16.24691 | 60.45275 | 33.94383 | 38.87781 | 24.35411 | 38.76748 | 20.61791  | 49.37932  | 45.0624   | 29.48041 | 0.12194   | 0.136186        | 0.166799              | 0.145648           | Purine                           | 0.793    | 120.0416 | C5H4N4   | 120-73-0    | 5 Imidazop -   | -               | -                                                                                                  |                                 |            |
| NEG0000 | 1.558703 | 0.491823 | 1.072434 | 0.277605 | 0.466535 | 0.512161 | 187.8786 | 176.5194 | 155.3993 | 188.1197 | 423.949   | 226.0567  | 1         | 222.9858 | 7.800808  | 0.00028         | 0.00084               | 0.683852           | acetophenone                     | 99.5     | 2.697    | 120.0558 | C8H8O       | 98-86-2        | 14 Organoos     | C07113                                                                                             | ko01120/ Global                 | metabolism |
| NEG0000 | 10.12627 | 7.371586 | 87.04915 | 9.244133 | 11.37105 | 7.91237  | 76.4148  | 73.4388  | 69.90762 | 63.51915 | 75.3324   | 71.4496   | 22.17909  | 17.67704 | 0.1692311 | 0.003656        | 0.007719              | 0.296588           | Benzonitrile                     | 96       | 2.841    | 122.0351 | C7H6N2      | 65-85-0        | 13 Benzene      | c00180                                                                                             | ko01100/ Amino acid Metabolism  |            |
| NEG0000 | 69.53637 | 46.34816 | 78.65214 | 62.6149  | 55.20181 | 53.3589  | 38.1866  | 14.722   | 95.94832 | 39.3931  | 28.25732  | 206.003   | 60.9155   | 92.5585  | 0.602661  | 0.312515        | 0.24914               | 0.163265           | Pyrrogallol                      | 96.7     | 0.917    | 129.0408 | C6H2O3      | 98-79-3        | 13 Carboxyl     | C001879                                                                                            | ko01100/ Amino acid Metabolism  |            |
| NEG0000 | 2367.548 | 1762.489 | 2556.617 | 1717.015 | 2127.238 | 2515.234 | 2072.239 | 2105.67  | 1868.939 | 1239.309 | 2093.606  | 231.787   | 217.435   | 1915.591 | -0.18054  | 0.034801        | 0.28148               | 0.367078           | Iaconic acid                     | 98.8     | 1.367    | 130.0248 | C5H6O4      | 97-65-4        | 13 Fatty        | Acy C00490                                                                                         | ko00660/ CarbohydrateMetabolism |            |
| NEG0000 | 46.8331  | 27.76115 | 43.30042 | 39.58238 | 22.66526 | 44.99593 | 264.0316 | 151.4671 | 100.1259 | 207.2181 | 180.8553  | 74.7565   | 37.85027  | 179.7424 | 2.247555  | 0.727E-05       | 0.000402              | 0.546945           | Ketoleuic acid                   | 2.347    | 130.0613 | C6H10O3  | 816-66-0    | 13 Keto acid   | C00233          | ko01100/ Amino acid Metabolism                                                                     |                                 |            |
| NEG0000 | 180.6674 | 115.8781 | 219.465  | 157.4339 | 127.1328 | 202.9077 | 360.0644 | 410.0726 | 279.1623 | 338.9553 | 344.7658  | 482.8635  | 72.6323   | 64.5614  | 0.1310233 | 0.000426        | 0.046561              | DL-β-Leu           | 99.4                             | 1.316    | 131.0929 | C6H13NO2 | 5699-54-7   | 13 Carboxyl -  | -               | -                                                                                                  |                                 |            |
| NEG0000 | 173.9067 | 219.6884 | 287.6929 | 209.8768 | 91.22637 | 213.3021 | 663.367  | 321.815  | 441.285  | 607.481  | 650.304   | 770.8684  | 199.3156  | 609.1867 | 1.61183   | 1.86E-05        | 0.11804               | 0.954178           | Glutaric acid                    | 0.824    | 132.0405 | C5H8O4   | 110-94-1    | 13 Carboxyl    | C000489         | ko01120/ Amino acid Metabolism                                                                     |                                 |            |
| NEG0000 | 156.2179 | 142.3566 | 122.8219 | 103.506  | 133.9929 | 149.1035 | 197.166  | 112.8694 | 119.2281 | 91.498   | 136.5229  | 270.1127  | 134.9998  | 171.2321 | 0.347727  | 0.108533        | 0.221009              | 0.177273           | L-Asparagine                     | 0.785    | 132.0517 | C4H7NO2  | 70-47-3     | 13 Carboxyl    | C001512         | ko01100/ Amino acid Genetic Information Processing;Metabolism                                      |                                 |            |
| NEG0000 | 9.67317  | 8.947858 | 8.22214  | 7.442248 | 4.065446 | 9.355493 | 15.32153 | 11.67505 | 13.56403 | 15.81818 | 12.8762   | 18.93002  | 8.00576   | 14.69528 | 0.877087  | 0.000572        | 0.01014               | 0.113999           | Ornithine                        | 98.5     | 0.717    | 132.0881 | C5H12N2     | 70-84-8        | 13 Carboxyl -   | -                                                                                                  | -                               |            |
| NEG0000 | 954.3516 | 1604.821 | 825.1164 | 1801.329 | 398.382  | 3382.842 | 2484.006 | 3572.989 | 2439.264 | 4136.299 | 585.765   | 3372.956  | 1346.458  | 9.66E-05 | 2.200803  | L-Aspartic acid | 0.788                 | 133.0357           | C4H7NO2                          | 0.788    | 133.0357 | C4H7NO2  | 14191-95-8  | 8 Benzene      | c -             | -                                                                                                  | -                               |            |
| NEG0000 | 699.456  | 643.2549 | 648.5787 | 622.7689 | 403.5283 | 610.1523 | 1479.264 | 545.703  | 995.261  | 2468.674 | 1039.257  | 228.599   | 576.286   | 1486.103 | 1.366677  | 0.018191        | 0.03016               | 1.138715           | Deoxybenzoylbenzotriole          | 0.888    | 134.0269 | C20H18O2 | 97-67-6     | 4 Hydroxy      | C00149          | ko00030/ CarbohydrateMetabolism                                                                    |                                 |            |
| NEG0000 | 176.0316 | 122.5982 | 180.8622 | 120.8941 | 168.0232 | 186.221  | 155.0562 | 71.23172 | 299.4551 | 94.3531  | 171.7481  | 273.9941  | 153.2498  | 6.309541 | 0.434     | 0.4676102       | 0.073731              | Malic acid         | 1.302                            | 134.0164 | CSH1004  | 533-67-5 | 13 Organoos | C01801         | ko01100/ Global | metabolism                                                                                         |                                 |            |
| NEG0000 | 246.13   | 196.37   | 296.7483 | 258.8234 | 125.2606 | 247.6741 | 458.088  | 295.439  | 226.431  | 373.3234 | 368.4626  | 296.633   | 356.805   | 0.023635 | 0.021303  | 0.071432        | Deoxyrib. DEOXYRIBOSE | 85.3               | 1.267                            | 135.0526 | CSH5N5   | 73-24-5  | 12 Imidazop | C00147         | ko01100/ Global | metabolism                                                                                         |                                 |            |
| NEG0000 | 16.36257 | 23.6722  | 18.10817 | 11.44447 | 12.0082  | 17.93077 | 116.0996 | 80.47378 | 81.66612 | 152.9633 | 66.78871  | 46.80028  | 165.70106 | 90.74563 | 2.453162  | 0.000789        | 0.001099              | 0.347475           | Adenine                          | 0.811    | 136.0535 | C4H5N5   | 7306-96-9   | 12 Organoos    | C01620          | ko00053/ CarbohydrateMetabolism                                                                    |                                 |            |
| NEG0000 | 181.1992 | 1.750676 | 2.354151 | 1.599353 | 1.341794 | 1.920314 | 142.9353 | 68.2388  | 33.40145 | 145.2019 | 199.6082  | 141.8478  | 1.79541   | 121.8723 | 0.684912  | 0.000638        | 0.001665              | 0.498638           | 2-Methyl-2-Methyl                | 96.7     | 2.377    | 136.0506 | C8H8O2      | 118-90-1       | 13 Benzene      | c00215                                                                                             | ko01100/ Global                 | metabolism |
| NEG0000 | 641.6076 | 49.79307 | 66.4594  | 46.19948 | 34.59764 | 42.68647 | 3.640784 | 5.527487 | 2.462061 | 4.899598 | 5.852467  | 50.58622  | 4.102743  | 3.82638  | 3.56E-06  | 3.99E-05        | 0.10393               | Salicilic acid     | 96.6                             | 2.042    | 138.03   | C7H6O3   | 69-72-7     | 12 Benzene     | c00805          | ko01100/ Amino acid Environmental Information Processing;Metabolism                                |                                 |            |
| NEG0000 | 34.99572 | 54.52326 | 48.13887 | 25.56037 | 10.84011 | 21.25792 | 43.1997  | 44.35601 | 39.84501 | 42.92305 | 46.92354  | 46.23355  | 29.21938  | 43.94852 | 0.588889  | 0.020803        | 0.032483              | 0.153716           | 2-Keto-glut-2-Keto-glutaric acid | 0.872    | 145.0369 | CSH7N0   | 18465-15-9  | 4 Keto acid    | C00940          | ko00250/ Amino acid Metabolism                                                                     |                                 |            |
| NEG0000 | 525.407  | 1218.421 | 784.5302 | 553.0498 | 820.207  | 1636.987 | 130.7883 | 502.6255 | 121.4918 | 292.9843 | 169.4135  | 128.6748  | 224.3327  | -0.20486 | 0.000713  | 0.007218        | 0.136705              | Trans-3-4-Indoleac | 99.6                             | 2.374    | 145.051  | C9H7NO   | 487-89-8    | 12 Purine      | u -             | -                                                                                                  | -                               |            |
| NEG0000 | 32803.44 | 24518.77 | 38315    | 6962.057 | 19228.08 | 27708.04 | 207.424  | 24985.32 | 19436.93 | 16503.18 | 21793.53  | 96.146    | 24922.57  | 18845.98 | -0.4032   | 0.250804        | 0.287821              | 2.188032           | Oxoglutarate                     | 87.6     | 1.237    | 146.019  | CSH6O5      | 328-50-7       | 11 Keto acid    | C00026                                                                                             | ko01100/ Amino acid Metabolism  |            |
| NEG0000 | 0.287657 | 0.636741 | 0.615998 | 0.212604 | 0.541937 | 0.721561 | 6.904055 | 4.216028 | 3.899126 | 5.463184 | 3.285317  | 3.845713  | 1         | 4.587397 | 2.19767   | 2.54E-05        | 0.000672              | Adipic acid        | 66.5                             | 1.701    | 146.0573 | C6H10O4  | 124-04-9    | 4 Fatty        | Acy C06104      | ko01100/ Global                                                                                    | metabolism                      |            |
| NEG0000 |          |          |          |          |          |          |          |          |          |          |           |           |           |          |           |                 |                       |                    |                                  |          |          |          |             |                |                 |                                                                                                    |                                 |            |

|         |          |          |          |          |          |          |          |           |          |          |          |          |          |          |          |          |             |                                   |                              |                 |                    |                    |                                |                                                              |                                |   |   |
|---------|----------|----------|----------|----------|----------|----------|----------|-----------|----------|----------|----------|----------|----------|----------|----------|----------|-------------|-----------------------------------|------------------------------|-----------------|--------------------|--------------------|--------------------------------|--------------------------------------------------------------|--------------------------------|---|---|
| NEG0008 | 1.536795 | 1.205454 | 1.723155 | 1.576435 | 2.422307 | 1.31636  | 33.00901 | 24.97553  | 9.541541 | 29.48    | 62.64735 | 24.2992  | 1.630084 | 33.95442 | 4.380581 | 0.002609 | 0.005523    | 0.256677                          | N-Acetyl-D-10-Hydroxy-       | 96.4            | 3.76               | 188.1398           | C10H20O12422-37                | 7 Hydroxy -                                                  | -                              | - |   |
| NEG0008 | 13.44781 | 16.38043 | 19.35621 | 13.09167 | 19.93662 | 17.58399 | 29.68917 | 20.06697  | 17.32869 | 17.32869 | 34.66378 | 26.96678 | 17.32869 | 27.6231  | 0.916026 | 0.00515  | 0.01421     | 0.164207                          | N-Acetyl-N-Acetylglytamic ac | 0.894           | 189.0621           | CTH11N1188-37      | 8 CarbohydrC00624              | ko111001/ Amino ac Metabolism                                | -                              | - |   |
| NEG0008 | 4.843299 | 5.553598 | 2.642294 | 0.973872 | 4.447979 | 4.178105 | 7.099705 | 3.547818  | 1.363643 | 5.929335 | 4.011429 | 7.733062 | 3.773191 | 5.296644 | 4.88209  | 0.21059  | 0.246876    | 0.04364                           | 3-Dehydroquinoic acid        | 1.397           | 140.0462           | CTH10CE10534-44.8  | 8 Alcohols_C00944              | ko111001/ Amino ac Metabolism                                | -                              | - |   |
| NEG0008 | 0.245353 | 0.10598  | 0.622462 | 0.27246  | 0.107852 | 0.129488 | 0.21952  | 0.042612  | 0.068925 | 0.279488 | 0.288674 | 0.391162 | 1        | 1        | 0.042221 | 0.05956  | 0.012746    | 5-Hydroxy-5-Hydroxy-              | 81.9                         | 3.08            | 191.0568           | C10H9NC154-16      | 7 Indoles ac C05635            | ko111001/ Amino ac Metabolism                                | -                              | - |   |
| NEG0008 | 49663.53 | 48349.55 | 56653.45 | 42625.27 | 30852.36 | 44023.72 | 42426.85 | 52527.43  | 4051.17  | 30603.27 | 44662.72 | 50063.54 | 44744.65 | 45287.5  | 0.017398 | 0.899132 | 0.91567     | 0.51842                           | Citric acid:Citric acid      | 98.8            | 0.871              | 192.0255           | C6H8O7 77-92.9                 | 7 CarboxylC00158                                             | ko111001/ Amino ac Metabolism  | - | - |
| NEG0009 | 598.5276 | 552.8889 | 485.9422 | 715.9331 | 540.6347 | 682.3872 | 317.0284 | 167.7812  | 140.2656 | 173.2502 | 253.5768 | 311.9301 | 665.0495 | 227.3504 | -1.52917 | 0.002042 | 0.001564    | 0.889719                          | Quinic acid:(+)-quinic acid  | 0.835           | 192.0617           | CTH120E677-95.2    | 8 Quinolins C0296              | ko040040/ Amino ac Metabolism                                | -                              | - |   |
| NEG0009 | 130.8486 | 1295.427 | 1909.91  | 1228.577 | 659.1651 | 1717.718 | 814.6579 | 973.1895  | 660.9028 | 687.8361 | 1028.668 | 1058.689 | 1352.637 | 805.5573 | 0.47722  | 0.01619  | 0.02138     | 0.920818                          | D-Glucuronic acid            | 0.824           | 194.0417           | C6H10O7 170908.8   | 4 Furofur-                     | -                                                            | -                              | - |   |
| NEG0009 | 1.176222 | 1.009466 | 1.137225 | 3.257183 | 0.959191 | 1.23975  | 161.22   | 118.1052  | 77.63165 | 42.5135  | 126.682  | 61.7637  | 145.6162 | 262.217  | 7.483301 | 0.014721 | 0.026369    | 0.36171                           | ferrulic ac Ferrulic ac      | 95.4            | 2.972              | 194.0562           | C10H18O11335-24.6              | 8 Cinnaam-C01494                                             | ko111001/ BiosyntheMetabolism  | - | - |
| NEG0009 | 401.631  | 42337.47 | 43721.45 | 42784.71 | 30852.8  | 53467.77 | 14099.65 | 21215.52  | 14953.21 | 15845.86 | 20739.06 | 17482.55 | 43984.63 | 17389.31 | -1.338   | 0.3166   | 0.00516     | 7.47996                           | Gluconic Gluconic i          | 60.8            | 0.809              | 196.0566           | CH20H20252-95.5                | 8 OrganoC00257                                               | ko111001/ CarbohydMetabolism   | - | - |
| NEG0009 | 4.470339 | 5.175476 | 6.485337 | 4.972138 | 4.835527 | 3.972306 | 12.29968 | 29.93528  | 24.57635 | 29.0474  | 32.16936 | 5.845232 | 22.75717 | 1.993984 | 0.002023 | 0.000719 | 0.18916     | Syringic acid                     | 1.858                        | 198.0548        | CHH10CS530-57.4    | 10 Benzene c10833  | ko111020/ Global ac Metabolism | -                                                            | -                              |   |   |
| NEG0009 | 14.45979 | 17.49291 | 17.49291 | 17.49291 | 17.49291 | 17.49291 | 17.49291 | 17.49291  | 17.49291 | 17.49291 | 17.49291 | 17.49291 | 17.49291 | 17.49291 | 17.49291 | 17.49291 | 17.49291    | 17.49291                          | kowallandian                 | 3.472           | 198.0548           | CHH10CS530-57.4    | 12 Carboxyl-                   | -                                                            | -                              | - |   |
| NEG0009 | 73.01166 | 65.37715 | 81.33368 | 64.29631 | 64.33451 | 71.21298 | 64.34289 | 67.63799  | 65.85291 | 65.41    | 79.48172 | 70.74847 | 67.10637 | 0.07625  | 0.367914 | 0.402802 | 0.040495    | Camelidoximalen                   | 1.952                        | 200.0418        | C11H18N213533-86   | 4 Indoles ac       | -                              | -                                                            | -                              |   |   |
| NEG0009 | 29.16884 | 23.39769 | 33.3941  | 18.14933 | 29.1293  | 19.1461  | 15.5686  | 9.12409   | 13.4093  | 17.34775 | 20.4939  | 30.08425 | 9.14465  | 18.62374 | -0.06501 | 0.06095  | 0.011727    | (s)-Camphoric acid                | 3.242                        | 200.1034        | C10H16O1594-33.2   | 7 Carboxyl-        | -                              | -                                                            | -                              |   |   |
| NEG0009 | 9.957632 | 8.273014 | 9.6352   | 8.819683 | 7.81375  | 9.881542 | 14.86913 | 13.90025  | 11.20423 | 10.44355 | 15.38399 | 14.79942 | 9.06384  | 13.50941 | 0.575771 | 0.003959 | 0.02313     | 0.089955                          | Lauric acLauric ac           | 98.6            | 8.654              | 200.1176           | C12H24O143-07.7                | 8 Fatty AcylC02679                                           | ko111001/ Global ac Metabolism | - | - |
| NEG0009 | 153.5511 | 138.1372 | 195.525  | 55.46838 | 143.8785 | 184.5687 | 41.44823 | 39.49867  | 31.13449 | 43.91022 | 39.99867 | 15.2222  | 38.0069  | -1.9315  | 0.000663 | 0.001054 | 0.40522     | Allyl-Le-Ala-Ala-Ala              | 1.765                        | 202.1303        | C9H18N23303-34.2   | 7 Carboxyl-        | -                              | -                                                            | -                              |   |   |
| NEG0010 | 453.7122 | 267.3629 | 425.9433 | 270.1805 | 263.0399 | 323.8879 | 885.5571 | 768.9756  | 676.2199 | 764.0497 | 759.6775 | 847.5521 | 334.7865 | 1.230336 | 1.986-06 | 3.01E-05 | 1.002725    | L-Tryptoph-D-trypt                | 84                           | 1.244           | 204.0884           | C11H12N723-23      | 7 Indoles ac C00078            | ko111001/ Amino ac Genetic Information Processing;Metabolism | -                              | - |   |
| NEG0010 | 1.777514 | 1.725688 | 2.366883 | 2.347495 | 1.367054 | 1.372685 | 0.349662 | 0.349662  | 0.349662 | 0.349662 | 0.349662 | 0.349662 | 0.349662 | 0.349662 | 0.349662 | 0.349662 | 0.349662    | 0.349662                          | 0.349662                     | 97.3            | 2.865              | 200.1079           | C10H8O120-18-3                 | 7 -                                                          | -                              | - |   |
| NEG0010 | 73.46336 | 76.41258 | 109.2693 | 95.74262 | 109.8526 | 103.1551 | 217.7889 | 167.6506  | 107.3006 | 156.2531 | 159.5321 | 53.74856 | 94.01595 | 143.7123 | 0.612206 | 0.065587 | 0.08768     | 0.243701                          | Garcinia acid                | 0.953           | 205.2025           | C6H8O8 27750-10.3  | 7 Carboxyl-                    | -                                                            | -                              | - |   |
| NEG0010 | 0.17577  | 0.127069 | 0.206622 | 0.138989 | 0.130221 | 0.157977 | 0.356693 | 1.064791  | 1.947607 | 4.893644 | 1.484239 | 2.275674 | 0.054175 | 0.054175 | 0.054175 | 0.054175 | 0.054175    | 0.054175                          | 0.054175                     | 2.396           | 208.0358           | C10H8O5574-84.5    | 6 -                            | -                                                            | -                              | - |   |
| NEG0010 | 125.0738 | 102.4466 | 140.5039 | 135.8991 | 209.4422 | 130.0497 | 545.2549 | 397.144   | 223.8758 | 408.6441 | 468.2103 | 522.2491 | 140.6002 | 427.563  | 1.604538 | 0.000176 | 0.000588    | 0.798042                          | Lipic acid, reduced          | 0.841           | 208.0568           | CHH16C2462-20.4    | 11 Fatty Acyl-                 | -                                                            | -                              | - |   |
| NEG0010 | 15.7954  | 10.20166 | 13.5288  | 14.28968 | 16.02293 | 10.12886 | 10.91246 | 6.984143  | 11.28886 | 10.34195 | -0.35233 | 13.11295 | 10.34195 | 13.11295 | 0.13092  | 0.16247  | 0.050565    | Chalcone                          | 0.826                        | 208.0915        | C15H12O194-41.7    | 12 Linear 1,3-     | -                              | -                                                            | -                              |   |   |
| NEG0010 | 46666.3  | 49920.49 | 58852.24 | 41.0543  | 30960.69 | 49930.32 | 47561.81 | 57079.3   | 47855.92 | 40343.3  | 51975.49 | 55054.79 | 46028.58 | 49978.43 | 0.117084 | 0.40189  | 0.43742     | 1.832749                          | GalactaricMUCIC Acid         | 0.826           | 210.035            | CHH10C526-99.8     | 7 OrganoC00879                 | ko00053/ CarbohydMetabolism                                  | -                              | - |   |
| NEG0010 | 29.15337 | 26.36273 | 32.16419 | 25.05265 | 38.04816 | 26.68512 | 30.04816 | 32.04816  | 36.96176 | 39.57504 | 14.57834 | 34.57834 | 60.07969 | 119.0171 | 0.16175  | 0.029929 | 0.23998     | 5-Galactaric-D-4-diacetylphlorogl | 2.392                        | 210.0165        | C10H18O110642-42   | 6 Cinnaam-C05619   | ko00710/ Energy m Metabolism   | -                                                            | -                              |   |   |
| NEG0010 | 821.5811 | 1258.534 | 19522083 | 1203.573 | 643.289  | 1263.841 | 70.51326 | 883.1625  | 705.3202 | 781.0881 | 856.7895 | 996.9679 | 116.8108 | 859.1442 | -0.44408 | 0.133173 | 0.164736    | 0.539802                          | Sedobutepulose               | 0.858           | 210.0174           | CTH10C73019-74.7   | 7 OrganoC02076                 | ko00710/ Energy m Metabolism                                 | -                              | - |   |
| NEG0010 | 2.628544 | 3.195252 | 3.27494  | 3.685337 | 3.27494  | 3.685337 | 3.195252 | 3.27494   | 3.685337 | 3.195252 | 3.27494  | 3.685337 | 3.195252 | 3.27494  | 3.685337 | 3.195252 | 3.27494     | 3.685337                          | 3.195252                     | 2.103           | 212.012            | CTH10C73019-74.7   | 6 Benzene c-                   | -                                                            | -                              | - |   |
| NEG0010 | 5.915165 | 4.728788 | 5.28985  | 4.728788 | 5.28985  | 4.728788 | 5.28985  | 4.728788  | 5.28985  | 4.728788 | 5.28985  | 4.728788 | 5.28985  | 4.728788 | 5.28985  | 4.728788 | 5.28985     | 4.728788                          | 5.28985                      | 4.942           | 212.012            | CTH10C73019-74.7   | 6 Benzene c-                   | -                                                            | -                              | - |   |
| NEG0011 | 17.3318  | 13.3301  | 13.2581  | 85.02611 | 74.10092 | 144.2221 | 39.10611 | 88.98978  | 26.82648 | 50.63533 | 49.01405 | 64.83895 | 14.4785  | 48.22326 | -1.24728 | 0.00045  | 0.00216     | 0.353992                          | Dihydroxymannic acid         | 5.25            | 212.0129           | C12H22O198674-52.3 | 6 Linolic a-                   | -                                                            | -                              | - |   |
| NEG0011 | 837.8523 | 61.1744  | 8807.887 | 585.4374 | 586.4734 | 586.4734 | 586.4734 | 586.4734  | 586.4734 | 586.4734 | 586.4734 | 586.4734 | 586.4734 | 586.4734 | 586.4734 | 586.4734 | 586.4734    | 586.4734                          | 586.4734                     | 0.854           | 214.0231           | CSH110719007-18    | 5 OrganoC011437                | ko111001/ Global ac Metabolism                               | -                              | - |   |
| NEG0011 | 1.744178 | 1.342576 | 2.527886 | 1.960914 | 2.60806  | 1.740418 | 2.15757  | 2.183338  | 1.762514 | 1.715533 | 1.930895 | 2.174922 | 1.982572 | 1.987463 | 0.033555 | 0.982763 | 0.982763    | 0.019958                          | Succinylproline              | 1.879           | 215.078            | CHH13N63250-32.2   | 6 -                            | -                                                            | -                              | - |   |
| NEG0011 | 16.80957 | 27.86391 | 25.84519 | 32.14142 | 30.88398 | 15.43875 | 44.97371 | 32.99558  | 35.66263 | 27.96321 | 46.73991 | 0.742519 | 0.303575 | 0.343211 | 0.007039 | 0.303575 | 0.343211    | 0.007039                          | N-Nonanoylglycine            | 3.276           | 215.1508           | C11H21NNA          | 6 Carboxyl-                    | -                                                            | -                              | - |   |
| NEG0011 | 2.444704 | 0.145574 | 0.885798 | 0.207413 | 1.315732 | 0.959789 | 0.203167 | 0.189796  | 0.718611 | 0.162657 | 0.191826 | 0.237823 | 1.145057 | 0.536607 | 0.732283 | 0.760218 | 0.005826    | L-2,3,4-Tetrahydro-beta-car       | 4.405                        | 216.0884        | C12H12N242430-90.4 | 6 Indoles ac       | -                              | -                                                            | -                              |   |   |
| NEG0011 | 2.012302 | 1.386173 | 1.78997  | 1.432845 | 1.617547 | 1.401114 | 84.55327 | 144.10934 | 15.24278 | 50.81791 | 123.5685 | 45.42477 | 1.606809 | 0.614943 | 5.23751  | 0.006832 | 0.34457     | 12-Hydroxy-D-Hydroxy-             | 89.8                         | 2.162           | 217.1212           | C14H20O505-95.3    | 6 Hydroxy -                    | -                                                            | -                              |   |   |
| NEG0011 | 192.9153 | 130.328  | 237.9794 | 187.1676 | 145.2879 | 206.5455 | 154.9371 | 125.7119  | 100.9115 | 125.9198 | 142.2667 | 128.9273 | 183.354  | 129.7891 | -0.49846 | 0.013228 | 0.022104    | 0.28306                           | Pantothnic acid              | 1.768           | 219.0147           | CHH17N137-08.6     | 5 Alcohols_C00864              | ko111001/ Global ac Metabolism                               | -                              | - |   |
| NEG0011 | 116.087  | 170.0893 | 105.9872 | 103.1462 | 102.8023 | 107.4852 | 32.61951 | 45.74294  | 54.7294  | 19.42666 | 19.42666 | 39.79607 | -1.11634 | 0.004048 | 0.0775   | 0.308941 | Isofraxidin | 4.56                              | 222.0549                     | C11H18O486-21.6 | 9 -                | -                  | -                              | -                                                            |                                |   |   |
| NEG0011 | 17.77018 | 12.59623 | 19.80467 | 14.9689  | 9.250489 | 14.29866 | 11.06094 | 10.00176  | 11.79603 | 13.00035 | 14.77885 | 19.32368 | 14.77885 | 19.32368 | -0.21444 | 0.340478 | 0.378884    | 0.034881                          | Flavone                      | 0.835           | 222.0725           | C15H10O525-82.6    | 19 Flavonoid-                  | -                                                            | -                              | - |   |
| NEG0012 | 789.7399 | 662.4962 | 761.6149 | 523.4191 | 623.4191 | 623.4191 | 623.4191 | 623.4191  | 623.4191 | 623.4191 | 623.4191 | 623.4191 | 623.4191 | 623.4191 | 623.4191 | 623.4191 | 623.4191    | 623.4191                          | 623.4191                     | 0.855           | 224.0517           | C14H8O3129-43.1    | 19 -                           | -                                                            | -                              | - |   |
| NEG0012 | 7.91964  | 6.400213 | 6.358442 | 4.229824 | 6.664488 | 5.122194 | 5.122194 | 5.122194  | 5.122194 | 5.122194 | 5.122194 | 5.122194 | 5.122194 | 5.122194 | 5.122194 | 5.122194 | 5.122194    | 5.122194                          | 5.122194                     | 86.3            | 2.717              | 224.067            | C11H20O530-59.6                | 6 -                                                          | -                              | - | - |
| NEG0012 | 0.366106 | 0.56106  | 0.375142 | 0.286405 | 1.339035 | 0.338674 | 5.371004 | 0.586985  | 2.193722 | 14.41616 | 10.29016 | 17.10973 | 1.955473 | 2.574216 | 0.00067  | 0.001736 | 0.017149    | Chenisiid-5-(1-Carboxyvinyl)-     | 1.5                          |                 |                    |                    |                                |                                                              |                                |   |   |

|         |           |          |           |          |          |          |          |          |          |          |          |          |          |           |           |           |           |                                  |                                 |                          |          |            |            |              |                    |              |                      |                                             |
|---------|-----------|----------|-----------|----------|----------|----------|----------|----------|----------|----------|----------|----------|----------|-----------|-----------|-----------|-----------|----------------------------------|---------------------------------|--------------------------|----------|------------|------------|--------------|--------------------|--------------|----------------------|---------------------------------------------|
| NEG0017 | 7.166736  | 7.570067 | 9.158924  | 7.504921 | 6.334216 | 8.19152  | 75.90867 | 48.18593 | 43.69478 | 76.08661 | 61.40489 | 82.24203 | 7.654397 | 64.58715  | 3.076886  | 5.76E-06  | 5.35E-05  | 0.352948                         | $\alpha$ -LinolenOleic acid     | 97.5                     | 7.983    | 278.2232   | C18H33O2   | 463-40-1     | 4 Fatty Acy C06427 | ko011001/    | Global an Metabolism |                                             |
| NEG0017 | 70.24949  | 44.34879 | 74.06522  | 45.06057 | 53.19739 | 73.08882 | 54.18128 | 46.7853  | 53.34926 | 37.2473  | 47.21703 | 52.88899 | 60.00171 | 48.61138  | -0.03071  | 0.101244  | 0.129442  | 0.109156                         | Asparagiasin-phe                |                          | 1.87     | 279.1208   | C13H17N1NA |              | 3 Carboxyli-       | -            | -                    |                                             |
| NEG0017 | 96.70146  | 68.82228 | 95.7855   | 69.28034 | 78.13914 | 100.2918 | 50.88267 | 57.89241 | 74.02191 | 48.48018 | 42.63095 | 72.15631 | 84.83829 | 57.6774   | -0.055671 | 0.000398  | 0.011553  | 0.021804                         | L-beta-asn-Aspa-                | 94.2                     | 1.974    | 280.1049   | C13H16N1NA |              | 3 -                | -            | -                    |                                             |
| NEG0017 | 656.8136  | 878.402  | 732.4917  | 502.5731 | 724.9071 | 731.5367 | 45.31634 | 3197.62  | 2629.475 | 2662.641 | 3901.907 | 3095.937 | 704.4542 | 3333.955  | 2.242657  | 6.35E-06  | 5.55E-05  | 2.473759                         | Linoleic a(Z),11(E)             | 99.6                     | 10.363   | 280.2389   | C18H32O2   | 60-33-3      | 4 Fatty Acy C01595 | ko011001/    | Global an Metabolism |                                             |
| NEG0017 | 14.75651  | 12.21739 | 15.03738  | 17.67013 | 18.4322  | 19.0542  | 11.95606 | 14.18431 | 12.19137 | 17.47313 | 17.00294 | 16.24495 | 15.51619 | 12.32188  | -0.19753  | 0.32449   | 0.360439  | 0.02841                          | 4-Hydrox-N-hydroxyphenyl        |                          | 2.595    | 281.0888   | C13H15N1S  | 1029120-37   | 4 -                | C05595       | ko003501/            | Amino ac Metabolism                         |
| NEG0017 | 1.623689  | 1.269781 | 2.076127  | 1.286184 | 1.536013 | 1.379248 | 8.900482 | 4.203678 | 1.59492  | 6.105951 | 8.1765   | 7.941102 | 1.528522 | 6.154467  | 2.009497  | 0.002473  | 0.000524  | 0.098365                         | Xylobiose                       |                          | 1.313    | 282.0938   | C10H18O2   | 6860-47-5    | 5 Organoos         | C01630       | ko020101/            | MembranEnvironmental Information Processing |
| NEG0017 | 63.28544  | 36.02274 | 72.31965  | 61.26745 | 88.30336 | 58.31136 | 13.03095 | 17.1801  | 11.52009 | 5.691522 | 9.365151 | 74.87396 | 63.51272 | 10.71778  | 2.55385   | 2.69E-05  | 0.001419  | 0.328089                         | ArtemisinNP-00519               | 88.5                     | 2.378    | 282.1458   | C15H22O2   | 63968-64-9   | 3 -                | -            | -                    |                                             |
| NEG0017 | 0.192895  | 1.627666 | 2.649781  | 3.580158 | 0.193955 | 258.7044 | 61.56605 | 59.90596 | 156.207  | 127.8643 | 175.8818 | 5.083147 | 138.5151 | 4.768177  | 0.001838  | 0.001419  | 0.518997  | (6E,8R,10J,(6E,8R,10J)-8-Hydrox  |                                 | 5.526                    | 282.1819 | C16H22O2   | 2190485-67 | 4 -          | -                  | -            |                      |                                             |
| NEG0017 | 15572.759 | 1195.826 | 1508.623  | 1141.571 | 1508.865 | 1190.035 | 2317.194 | 2578.341 | 1762.896 | 156.2164 | 2256.505 | 1843.868 | 1352.947 | 1996.737  | 0.561539  | 0.000428  | 0.000809  | 1.153291                         | Acic OleicOleic acid            | 99.6                     | 11.085   | 282.2546   | C18H34O2   | 112-80-1     | 4 Fatty Acy C00712 | ko010401/    | Lipid metMetabolism  |                                             |
| NEG0018 | 0.180806  | 0.174853 | 0.12713   | 0.137745 | 0.134243 | 0.203789 | 0.369016 | 0.233126 | 0.419844 | 0.52112  | 4.742001 | 1.198328 | 1.531126 | 1.4249638 | 1.24806   | 0.010738  | 0.014264  | 0.0457032                        | Rhein                           |                          | 4.322    | 284.0311   | C15H18O2   | 478-43-3     | 3 Anthrac-         | -            | -                    |                                             |
| NEG0018 | 1268.851  | 1055.515 | 1535.572  | 885.3814 | 995.0433 | 1156.478 | 1272.701 | 1353.018 | 1642.739 | 1184.889 | 1632.908 | 1885.62  | 1149.531 | 1570.311  | 0.458004  | 0.013535  | 0.022285  | 0.893911                         | Stearic acidStearic acid        | 99.7                     | 12.227   | 284.2702   | C18H36O2   | 211-28       | 4 Fatty Acy C01530 | ko010401/    | Lipid metMetabolism  |                                             |
| NEG0018 | 152.731   | 131.5347 | 185.2524  | 127.2355 | 86.4521  | 201.6712 | 122.1266 | 67.59115 | 91.96106 | 98.34079 | 74.75127 | 129.3235 | 149.332  | 97.48447  | -0.6155   | 0.024596  | -0.001734 | 0.278529                         | Morphine C1280000               |                          | 1.585    | 285.1314   | C17H19N5   | 57-27-2      | 2 Morphine         | C01516       | ko011001/            | BiosyntheMetabolism                         |
| NEG0018 | 36.94168  | 6.149897 | 3.312389  | 7.598541 | 5.330326 | 5.872137 | 684.2088 | 364.2357 | 93.46006 | 236.4786 | 681.1965 | 205.3818 | 10.86829 | 377.4936  | 1.183255  | 0.005148  | 0.009476  | 0.858893                         | Luteolin Luteolin               | 98                       | 4.32     | 286.0466   | C15H10O2   | 491-70-3     | 3 Flavonoi         | C01514       | ko011001/            | BiosyntheMetabolism                         |
| NEG0018 | 0.76553   | 0.543553 | 0.321167  | 0.198719 | 0.530192 | 0.232576 | 5.690909 | 9.496163 | 5.887031 | 1.00665  | 1.923043 | 1.375361 | 1        | 1.4231224 | 0.281075  | 0.020038  | 0.031679  | 0.075189                         | Kaempfer(4E)-5-(4-Methoxy       |                          | 2.389    | 286.0519   | C15H10O2   | 520-18-3     | 7 Flavonoi         | C05903       | ko011001/            | BiosyntheMetabolism                         |
| NEG0018 | 3.69022   | 2.097313 | 4.219035  | 2.91102  | 2.054461 | 4.59061  | 28.16302 | 20.53866 | 14.34352 | 32.50275 | 30.58625 | 35.23824 | 33.44626 | 26.89524  | 0.050493  | 2.78E-05  | 0.000151  | 0.22512                          | 2,4,6-trihydro-2,4,6-Trihy      | 90.9                     | 3.267    | 288.0622   | C15H12O2NA |              | 4 -                | -            | -                    |                                             |
| NEG0018 | 10.78834  | 6.26086  | 13.35248  | 10.33732 | 4.882287 | 10.28927 | 13.8204  | 22.98888 | 36.82331 | 28.3927  | 27.78167 | 25.33307 | 21.6181  | 28.7632   | 2.97E-05  | 0.000157  | 0.192105  | Phlorin 1,5-Anhydro-1-(2,4,6     |                                 | 2.51                     | 288.0835 | C12H16O2   | 28217-60-9 | 3 Carbohyd-  | -                  | -            | -                    |                                             |
| NEG0018 | 53.42715  | 21.40374 | 29.93347  | 28.93986 | 16.83986 | 32.1811  | 7.131033 | 13.33038 | 11.16127 | 8.739515 | 6.607391 | 17.24162 | 30.4542  | 10.70194  | -1.5087   | 0.000453  | 0.000549  | 0.184501                         | Atropine                        |                          | 1.691    | 289.1626   | C17H23N    | 55-48-1      | 17 Tropae          | eC01479      | ko011001/            | BiosyntheMetabolism                         |
| NEG0018 | 50.27501  | 47.63635 | 55.100212 | 26.76002 | 45.9162  | 55.7348  | 56.14508 | 30.22381 | 27.87081 | 7.848779 | 44.44564 | 12.96611 | 46.22075 | 29.91534  | -0.62766  | 0.085296  | 0.116765  | 0.116261                         | Sedohexulose 7-phosphate        |                          | 0.851    | 290.0139   | C7H15O2    | 2646-35-7    | 4 Organic          | cC0582       | ko011001/            | CarbohydMetabolism                          |
| NEG0018 | 270.9691  | 367.8493 | 352.4793  | 246.5144 | 122.8294 | 196.0657 | 29.2257  | 21.13495 | 28.54351 | 28.31574 | 14.74425 | 35.95829 | 22.7161  | 26.32041  | -0.31082  | 0.000138  | 0.000511  | 0.635594                         | Catechin                        |                          | 1.824    | 290.0755   | C15H14O2   | 154-23-4     | 12 Flavonoi        | -            | -                    | -                                           |
| NEG0019 | 6.366384  | 3.878641 | 10.04417  | 7.4748   | 3.473006 | 4.158796 | 4.11216  | 2.458108 | 2.014476 | 3.048828 | 3.174105 | 2.707811 | 1.811    | 5.8993    | 2.968986  | -0.99057  | 0.023662  | 0.036648                         | 0.06439                         | N-gammagamma-Glutamyl-S- |          | 0.56       | 290.0926   | C11H18NNA    |                    | 3 Carboxyli- | -                    | -                                           |
| NEG0019 | 6.429564  | 7.192065 | 7.607952  | 4.772012 | 5.045358 | 8.809763 | 71.7919  | 36.22241 | 26.82836 | 60.47048 | 63.4774  | 53.58636 | 6.642801 | 52.0627   | 2.970387  | 7.44E-05  | 0.000332  | 0.313102                         | Argininos Argininosuccinic acid |                          | 0.787    | 290.1213   | C10H18N    | 2387-71-5    | 4 Carboxyli        | C03406       | ko011001/            | Amino ac Metabolism                         |
| NEG0019 | 41.95884  | 31.79243 | 46.35224  | 35.98348 | 37.12665 | 45.11826 | 20.76882 | 22.40065 | 23.37055 | 19.41853 | 19.04911 | 30.59263 | 39.77219 | 22.60005  | -0.81361  | 0.000153  | 0.000535  | 0.18469                          | Glutamin phe-gln                |                          | 1.877    | 293.1366   | C14H19N    | 92327-75-8   | 3 Carboxyli-       | -            | -                    | -                                           |
| NEG0019 | 94.08712  | 71.08546 | 104.6938  | 72.94247 | 75.28319 | 89.78859 | 52.098   | 51.38731 | 53.72438 | 40.10378 | 40.46613 | 56.46952 | 84.64678 | 49.19619  | -0.078291 | 0.000195  | 0.000635  | 0.263202                         | Tyrosyl-L-4-Hydroxyprolylthn    |                          | 1.953    | 294.1205   | C14H18N    | 936346-34    | 3 Carboxyli-       | -            | -                    | -                                           |
| NEG0019 | 28.69405  | 17.86211 | 29.38618  | 18.12975 | 8.834593 | 29.31031 | 15.77669 | 15.51224 | 6.224062 | 12.26418 | 14.64128 | 10.39236 | 12.20367 | 12.46219  | -0.82232  | 0.029407  | 0.043973  | 0.116772                         | Leucyl-L-Leucyltyrosine         |                          | 1.982    | 294.157    | C15H22NNA  |              | 3 Carboxyli-       | -            | -                    | -                                           |
| NEG0019 | 186.5005  | 292.1907 | 303.4504  | 223.8746 | 46.90186 | 295.602  | 295.3478 | 229.7635 | 145.3064 | 45.97767 | 276.6022 | 43.03225 | 224.7533 | 237.7033  | 0.008082  | 0.851952  | 0.874916  | 0.120669                         | 6-Gingerol (+)-6J-Gingerol      |                          | 5.899    | 294.1821   | C17H26O2   | 58253-27-3   | 3 Phenols          | C10462       | ko011001/            | BiosyntheMetabolism                         |
| NEG0019 | 6.078651  | 3.722301 | 4.447232  | 2.834608 | 3.229115 | 3.043336 | 7977.722 | 4407.325 | 2176.975 | 8218.303 | 13636.56 | 8771.049 | 93.25124 | 7531.388  | 0.190696  | 0.000809  | 0.000248  | 0.394806                         | Phenyl-phalic acid              |                          | 2.381    | 296.0519   | C13H12O2   | 53735-05-4   | 4 Fatty Acy-       | -            | -                    | -                                           |
| NEG0019 | 30.79828  | 25.84035 | 5.977138  | 13.26635 | 21.50528 | 29.08455 | 49.26335 | 51.20862 | 30.29015 | 26.66511 | 46.75801 | 29.83343 | 21.07154 | 39.06204  | 0.888827  | 0.014136  | 0.022125  | 0.1792                           | Avaneticin-13-HOde              |                          | 8.739    | 296.2338   | C18H32O2   | 177931-23    | 5 Fatty Acy C14762 | ko005911/    | Lipid metMetabolism  |                                             |
| NEG0019 | 2.219429  | 1.552006 | 3.932662  | 4.118761 | 0.905746 | 1.565554 | 0.033606 | 4.907624 | 3.275996 | 3.652256 | 8.824862 | 0.983873 | 2.382391 | 49.90396  | 0.009628  | 0.0032114 | 0.0467    | 0.065667                         | 12,13-Ept (+)-12J13             | 90.4                     | 9.273    | 296.2338   | C18H32O2NA |              | 4 Fatty Acy C14826 | ko011001/    | Global an Metabolism |                                             |
| NEG0019 | 10.08438  | 376.0714 | 1209.859  | 960.6756 | 121.3075 | 483.3071 | 62.98753 | 33.74907 | 46.26303 | 48.82149 | 63.17639 | 66.12558 | 271.1338 | 53.85385  | -3.74315  | 0.000285  | 0.000857  | 1.091569                         | OestruthrinOestruthrin          | 91.1                     | 9.881    | 298.1589   | C19H22O2   | 148-82-4     | 6 -                | -            | -                    |                                             |
| NEG0020 | 37.67546  | 16.2728  | 42.2036   | 25.11405 | 3.172795 | 13.12541 | 11.59075 | 11.42297 | 5.618085 | 6.208192 | 5.703693 | 7.453899 | 22.92769 | 7.833801  | 0.035172  | 0.051424  | 0.141771  | OestruthrinNP-01154              | 80.1                            | 8.258                    | 288.2495 | C18H34O2   | 114-22-0   | 4 Fatty Acy- | -                  | -            | -                    |                                             |
| NEG0020 | 31.06430  | 467.395  | 387.3068  | 288.776  | 211.8812 | 475.7522 | 45.67304 | 59.15884 | 21.54202 | 26.40514 | 27.36341 | 355.3619 | 348.3815 | 32.0868   | 2.46E-05  | 0.000144  | 0.080512  | 4-(beta-D-GlC-4-beta-D-Glucosylo |                                 | 2.049                    | 300.0834 | C13H16N1NA |            | 3 Carboxyli- | -                  | -            | -                    |                                             |
| NEG0020 | 0.163269  | 0.126823 | 0.189611  | 0.141742 | 0.123573 | 0.193977 | 11.27633 | 3.989551 | 1.081982 | 6.933381 | 16.90656 | 4.986587 | 1        | 7.529066  | 2.912471  | 0.010049  | 0.017324  | 0.177508                         | QuercetinQuercetin              | 92.7                     | 3.699    | 302.0415   | C15H10O2   | 117-39-5     | 3 Flavonoi         | C00389       | ko011001/            | BiosyntheMetabolism                         |
| NEG0020 | 87.31686  | 61.65524 | 85.97424  | 55.76128 | 37.24431 | 56.46426 | 227.9785 | 93.56784 | 24.66466 | 15.82328 | 173.4265 | 184.3129 | 64.96338 | 173.2957  | 1.346287  | 0.001665  | 0.003776  | 0.465436                         | Tributytritybutyrin             |                          | 3.992    | 302.1718   | C15H26O2   | 21920        | 3 Glyceroli-       | -            | -                    | -                                           |
| NEG0020 | 28.41881  | 22.40184 | 29.78538  | 26.55018 | 18.05219 | 26.75561 | 50.7437  | 5.080713 | 44.97931 | 44.16544 | 41.43487 | 53.85895 | 25.32244 | 48.31158  | 0.931598  | 1.25E-05  | 0.93E-05  | 0.220889                         | Nicotianinicotianin             |                          | 0.779    | 303.1416   | C12H21N    | 34441-14-0   | 7 Flavonoi         | -            | -                    | -                                           |
| NEG0020 | 24.48019  | 15.64198 | 13.67814  | 33.50034 | 21.50867 | 7.725844 | 18.13061 | 9.810184 | 6.95966  | 12.96238 | 13.9201  | 29.15248 | 11.58334 | 13.9137   | 0.003766  | 0.000468  | 0.174458  | Gallocate(2S,3S)-2-(3,4,5-trihy  |                                 | 2.381                    | 306.0764 | C15H14O2   | 970-73-0   | 7 Flavonoi   | C01217             | ko011001/    | BiosyntheMetabolism  |                                             |
| NEG0020 | 0.3101959 | 33.86139 | 31.5509   | 27.1092  | 32.76354 | 31.25094 | 231.2881 | 272.8309 | 216.5596 | 151.8654 | 300.779  | 24.234   | 31.25926 | 235.9438  | 2.916088  | 1.92E-06  | 0.01E-05  | 0.685757                         | Dihomo-82,11Z,14                | 99.3                     | 10.624   | 306.2545   | C20H34O2   | 1783-84-2    | 4 Fatty Acy C03242 | ko011001/    | Global an Metabolism |                                             |

|         |           |          |          |          |          |          |          |          |          |          |          |          |          |          |          |          |           |              |                                                                                                   |                                                    |          |          |               |             |             |             |          |          |           |                                      |            |            |            |
|---------|-----------|----------|----------|----------|----------|----------|----------|----------|----------|----------|----------|----------|----------|----------|----------|----------|-----------|--------------|---------------------------------------------------------------------------------------------------|----------------------------------------------------|----------|----------|---------------|-------------|-------------|-------------|----------|----------|-----------|--------------------------------------|------------|------------|------------|
| NEG0025 | 5.931669  | 2.433829 | 6.959275 | 4.583903 | 1.703831 | 4.667658 | 255.476  | 384.7796 | 110.1962 | 359.0683 | 412.4579 | 212.636  | 4.380027 | 289.1023 | 6.044497 | 0.000138 | 0.000511  | 0.750228     | Centiopic                                                                                         | Centiopicrin                                       | 2.285    | 356.1094 | C16h42O2N     | NA          | 3           | -           | C09782   | ko01110/ | Global    | ac                                   | Metabolism |            |            |
| NEG0025 | 29.0428   | 24.26137 | 39.86655 | 35.1997  | 26.2366  | 93.26877 | 4.80839  | 9.009579 | 3.120766 | 4.923177 | 5.448779 | 9.042274 | 41.31192 | 6.058822 | 2.766495 | 0.008010 | 0.014356  | 0.253344     | Tarenoside                                                                                        |                                                    | 1.57     | 338.1285 | C16h22O16     | 61081-59-2  | 15          | -           | -        | -        | -         | -                                    |            |            |            |
| NEG0025 | 21.18525  | 16.61467 | 23.44167 | 15.24762 | 20.4284  | 26.10698 | 39.11951 | 50.32583 | 51.12677 | 37.48829 | 39.38771 | 56.06465 | 55.05401 | 1.512632 | 1.526321 | 0.000545 | 0.000201  | 0.226791     | Irigenin                                                                                          |                                                    | 1.373    | 360.0789 | C18H16O       | NA          | 5           | -           | -        | -        | -         | -                                    |            |            |            |
| NEG0026 | 1299.111  | 1384.553 | 1652.903 | 1575.551 | 735.1407 | 1546.294 | 453.0986 | 715.7467 | 503.264  | 455.446  | 702.7824 | 408.6478 | 1365.592 | 539.8309 | 1.338995 | 0.000228 | 0.000212  | 1.292355     | Rosmarinate                                                                                       |                                                    | 0.825    | 360.0886 | C18H16O       | 537-15-5    | 11          | Cinnamic    | C01850   | ko00350/ | Amino     | ac                                   | Metabolism |            |            |
| NEG0026 | 3.089618  | 10.37305 | 3.269216 | 2.369427 | 39.7343  | 17.96362 | 27.50014 | 17.96362 | 27.50014 | 17.96362 | 27.50014 | 23.05061 | 12.82973 | 36.04261 | 1.490213 | 0.009847 | 0.012619  | 0.179952     | guaniosino                                                                                        | Guanosine-5'-monophosphate                         | 1.239    | 363.0566 | C10H14N8-32-5 |             | 3           | Purine      | nuC00144 | ko01100/ | Global    | ac                                   | Metabolism |            |            |
| NEG0026 | 0.132513  | 0.119157 | 0.204337 | 0.126432 | 0.109624 | 0.270259 | 96.68077 | 66.81469 | 42.45671 | 94.29344 | 127.4487 | 129.5208 | 1        | 92.86199 | 6.537128 | 5.496705 | 0.000208  | 0.000215     | 0.144251                                                                                          | XMP                                                |          | 2.378    | 364.0393      | C10H13N     | 523-98-8    | 7           | Purine   | nuC00655 | ko01100/  | Global                               | ac         | Metabolism |            |
| NEG0026 | 108.8743  | 21.83894 | 27.91023 | 17.40251 | 17.67975 | 37.63642 | 24.88975 | 58.76192 | 49.17704 | 50.26192 | 134.387  | 73.01366 | 38.5703  | 68.41681 | 0.000735 | 0.180634 | 0.012710  | 0.177735     | Neuronic                                                                                          | Neuronic                                           | 99.5     | 12.901   | 366.3481      | C24H46O     | 506-37-6    | 4           | Fatty    | Ac       | C08323    | ko01040/                             | Lipid      | met        | Metabolism |
| NEG0026 | 0.378822  | 3.317767 | 12.38232 | 10.68813 | 2.02382  | 4.333612 | 17.55356 | 39.8201  | 116.3582 | 156.1615 | 272.2344 | 157.2349 | 6.780081 | 196.5608 | 4.857529 | 0.000096 | 0.000207  | 0.59856      | 3-Fenulol                                                                                         | (1R,3R,4S,5R)-1,3,4-trihydroxy-5-phenylpentan-3-ol | 2.183    | 368.192  | C17H20O       | 62929-69-5  | 4           | Alcohols    | -        | -        | -         | -                                    | -          |            |            |
| NEG0026 | 0.12599   | 0.607884 | 0.212587 | 0.146426 | 1.367911 | 0.171373 | 1.009917 | 3.820818 | 2.025029 | 0.767229 | 0.993237 | 1.719527 | 1        | 1.722626 | 0.78461  | 0.029533 | 0.040679  | 0.042608     | Gomphidic acid                                                                                    |                                                    | 2.403    | 372.075  | C18H20O       | 25328-77-2  | 9           | Benzene     | e-       | -        | -         | -                                    | -          |            |            |
| NEG0026 | 20.64478  | 11.1589  | 20.79795 | 14.4494  | 2.98836  | 1.721387 | 1.444745 | 1.161004 | 1.89714  | 2.058985 | 2.157912 | 13.18890 | 17.25327 | 2.93429  | 0.002135 | 0.004701 | 0.14232   | Dihydroxy    | (2S,3S,4S,5R,6R)-6-(3-hydroxy-2-methylbut-3-en-1-yl)-2,3-dihydroxy-4-methyl-5-oxohexanoic acid    | 2.459                                              | 372.194  | C16H20O  | NA            | 4           | -           | -           | -        | -        | -         |                                      |            |            |            |
| NEG0026 | 55.59338  | 59.0121  | 66.18397 | 49.81753 | 49.43376 | 44.60164 | 36.03376 | 23.46146 | 28.13826 | 23.94302 | 24.73971 | 43.12598 | 58.82026 | 29.91497 | 0.88997  | 7.25E-05 | 0.000318  | 0.220204     | Syringin                                                                                          | beta-Syringin                                      | 2.888    | 372.1406 | C17H24O       | 118-34-3    | 3           | -           | C01533   | ko00940/ | Biosynthe | Metabolism                           |            |            |            |
| NEG0026 | 20.66363  | 13.40251 | 22.1293  | 10.22725 | 10.6269  | 16.91519 | 68.84561 | 51.87954 | 38.6491  | 40.11489 | 70.8404  | 91.42215 | 17.29656 | 60.26196 | 1.800762 | 0.000052 | 0.000149  | 0.348133     | Tetrahydrocurcumin                                                                                |                                                    | 2.785    | 372.1587 | C22H24O       | 36862-04-1  | 3           | Diaryl      | hydro-   | -        | -         | -                                    | -          |            |            |
| NEG0026 | 0.604136  | 0.823927 | 1.118285 | 0.977146 | 0.59034  | 0.505784 | 0.820731 | 1.290083 | 0.458464 | 0.728813 | 1.027331 | 1.348463 | 1        | 1        | 0        | 0.330211 | 0.364668  | 0.013653     | Suacrenin                                                                                         |                                                    | 6.551    | 372.1956 | C22H28O       | 8377-13-3   | 5           | -           | -        | -        | -         | -                                    |            |            |            |
| NEG0027 | 0.4084873 | 2.696258 | 4.610286 | 3.307222 | 3.952548 | 3.728154 | 28.52625 | 21.37512 | 23.05995 | 16.16943 | 24.73302 | 17.46256 | 3.72989  | 21.88777 | 2.55292  | 2.40E-06 | 0.114E-05 | 0.02541      | Iscodiospyrin                                                                                     |                                                    | 2.561    | 374.0837 | C22H14O       | 20175-84-2  | 12          | Dihydro-    | -        | -        | -         | -                                    | -          |            |            |
| NEG0027 | 33.28452  | 50.80991 | 26.81392 | 24.05264 | 41.95676 | 36.39719 | 1152.764 | 45.25273 | 509.3309 | 675.4099 | 963.8496 | 722.1253 | 35.55247 | 774.7895 | 44.5782  | 1.86E-05 | 0.000118  | 1.296967     | Triplidoide                                                                                       |                                                    | 9.739    | 376.1538 | C20H24O       | 38647-10-8  | 4           | -           | -        | -        | -         | -                                    |            |            |            |
| NEG0027 | 12.0712   | 10.71721 | 7.917184 | 4.922821 | 5.671906 | 5.756415 | 165.6577 | 277.2899 | 231.0105 | 109.5851 | 136.8958 | 174.0097 | 6.973465 | 195.9111 | 4.81218  | 0.000001 | 0.000014  | 0.601566     | Tomenin                                                                                           |                                                    | 2.394    | 384.1042 | C17H18O       | 28446-08-4  | 3           | Coumarin    | -        | -        | -         | -                                    | -          |            |            |
| NEG0027 | 6.800101  | 3.803796 | 6.620292 | 4.561408 | 4.234595 | 3.589973 | 36.17126 | 24.08617 | 17.83676 | 25.60903 | 22.71975 | 27.4517  | 5.229944 | 25.64579 | 2.293854 | 1.14E-05 | 8.86E-05  | 0.213105     | Kanzonol                                                                                          | -                                                  | 1.942    | 384.1518 | C22H24O       | 156250-71-1 | 14          | Isoflavono- | -        | -        | -         | -                                    | -          |            |            |
| NEG0027 | 278.0948  | 292.9824 | 292.9824 | 277.7221 | 277.7221 | 277.7221 | 277.7221 | 277.7221 | 277.7221 | 277.7221 | 277.7221 | 277.7221 | 277.7221 | 277.7221 | 277.7221 | 277.7221 | 277.7221  | 277.7221     | 277.7221                                                                                          | 277.7221                                           | 2.574    | 386.1199 | C17H22O       | NA          | 3           | -           | -        | -        | -         | -                                    |            |            |            |
| NEG0027 | 1032.072  | 1204.332 | 1823.338 | 1523.176 | 1041.079 | 1305.884 | 819.7032 | 533.3536 | 704.8892 | 964.1684 | 758.5771 | 875.6693 | 1321.642 | 776.0601 | -0.76809 | 0.002854 | 0.005907  | 1.003662     | Corchoiol-3-Hydrox-                                                                               |                                                    | 2.284    | 386.192  | C19H30O       | NA          | 5           | Fatty       | Ac       | -        | -         | -                                    |            |            |            |
| NEG0027 | 13.25254  | 26.46071 | 2.000554 | 3.338322 | 4.736492 | 24.13653 | 4.664665 | 4.757208 | 7.561734 | 0.251672 | 5.008123 | 0.164313 | 12.65131 | 3.734619 | -1.76025 | 0.073237 | 0.096887  | 0.101857     | Globocarissapin                                                                                   |                                                    | 2.139    | 387.0612 | C12H21N       | 19041-10-2  | 11          | Organo-     | -        | -        | -         | -                                    | -          |            |            |
| NEG0027 | 1228.74   | 1224.216 | 1798.488 | 1134.784 | 599.8192 | 617.766  | 574.2528 | 804.7621 | 527.8795 | 544.7756 | 815.8899 | 477.5005 | 1267.636 | 624.1767 | -1.02211 | 0.000509 | 0.005959  | 1.060388     | Betanidin                                                                                         |                                                    | 0.826    | 388.0837 | C20H16N       | 2181-76-7   | 17          | Indoles     | ac       | C0859    | ko01110/  | Global                               | ac         | Metabolism |            |
| NEG0027 | 41.55143  | 1221.782 | 686.8764 | 53.66293 | 1547.357 | 3759.763 | 177.9529 | 124.3216 | 176.0642 | 181.8552 | 199.6789 | 138.429  | 176.0718 | 3.305545 | 0.006658 | 0.008668 | 1.25881   | Artemetin    | D-(+)-Mal                                                                                         | 70.3                                               | 1.007    | 388.12   | C20H20O       | 469-78-2    | 10          | Flavonoid   | C00208   | ko01100/ | Carbohydr | Environmental Information Processing | Metabolism |            |            |
| NEG0027 | 1.92324   | 0.951845 | 1.915449 | 1.551947 | 5.262561 | 1.508755 | 30.90782 | 27.14657 | 6.374113 | 28.17544 | 26.37905 | 30.47121 | 2.185633 | 24.99093 | 3.510566 | 0.000145 | 0.000053  | 0.220343     | Geniposic                                                                                         | geniposide                                         | 1.978    | 388.1357 | C17H24O       | 24512-63-8  | 3           | -           | -        | -        | -         | -                                    |            |            |            |
| NEG0028 | 0.15936   | 0.397625 | 1.606581 | 0.146307 | 0.366194 | 0.285982 | 262.2007 | 197.839  | 94.08761 | 164.7928 | 211.4271 | 135.1106 | 1        | 177.5763 | 7.472295 | 2.60E-05 | 0.000148  | 0.625562     | trans-Picoid                                                                                      |                                                    | 2.657    | 390.13   | C20H22O       | 27208-80-4  | 4           | Stilbenes   | -        | -        | -         | -                                    | -          |            |            |
| NEG0028 | 157.652   | 118.8171 | 169.8982 | 127.0968 | 94.27253 | 156.5845 | 274.8926 | 296.3011 | 238.4118 | 261.9076 | 223.964  | 363.8734 | 137.4627 | 276.5538 | 1.00852  | 0.000147 | 0.004034  | 0.533515     | Shanzhiside                                                                                       |                                                    | 7.692    | 392.1275 | C16H24O       | NA          | 11          | -           | -        | -        | -         | -                                    |            |            |            |
| NEG0028 | 2.806423  | 3.137369 | 2.590638 | 1.793854 | 3.899271 | 2.170119 | 13.70127 | 8.866291 | 10.31488 | 4.644016 | 13.09492 | 5.099473 | 7.327296 | 9.290142 | 1.765244 | 0.002173 | 0.004708  | 0.159947     | Acidissimolol                                                                                     |                                                    | 4.414    | 393.2346 | C25H31N       | 126006-00-8 | 10          | Prenol      | lip-     | -        | -         | -                                    | -          |            |            |
| NEG0028 | 17.15159  | 12.07882 | 20.1522  | 13.67948 | 12.36096 | 18.99923 | 14.61912 | 14.51091 | 11.3485  | 10.70577 | 12.2192  | 13.53167 | 15.7312  | 12.82145 | -0.29507 | 0.094643 | 0.121821  | 0.056379     | Rotenone                                                                                          | Rotenone                                           | 8.299    | 394.1432 | C23H22O       | 83-79-4     | 3           | Isoflavono  | C07593   | ko01110/ | Global    | ac                                   | Metabolism |            |            |
| NEG0028 | 6.038234  | 4.998485 | 4.998485 | 4.998485 | 4.998485 | 4.998485 | 4.998485 | 4.998485 | 4.998485 | 4.998485 | 4.998485 | 4.998485 | 4.998485 | 4.998485 | 4.998485 | 4.998485 | 4.998485  | 4.998485     | 4.998485                                                                                          | 4.998485                                           | 7.875    | 396.1586 | C23H24O       | 31271-07-5  | 3           | Benzopyr-   | -        | -        | -         | -                                    | -          |            |            |
| NEG0028 | 0.632196  | 0.495994 | 0.685215 | 0.501311 | 0.454239 | 0.307687 | 2.224699 | 0.224848 | 0.205554 | 4.64577  | 0.812427 | 1.359443 | 1        | 1.581015 | 0.668051 | 0.164131 | 0.199153  | 0.028678     | 5-Hydroxy-4-hydroxy-9-(4-hydroxy-3-methylbut-3-en-1-yl)-2,3-dihydroxy-4-methyl-5-oxohexanoic acid |                                                    | 3.293    | 440.1144 | C21H20O       | 17802-04-5  | 3           | Flavonoid   | -        | -        | -         | -                                    | -          |            |            |
| NEG0028 | 0.824833  | 1.378075 | 0.495289 | 0.254361 | 3.618164 | 1.25961  | 160.8573 | 254.3372 | 151.1022 | 279.4266 | 54.86386 | 52.23015 | 13.76181 | 4.476489 | 0.00896  | 0.01256  | 0.45457   | Shoyuflavone |                                                                                                   | 2.389                                              | 442.0883 | C19H14O  | 190712-88-8   | 3           | Isoflavono- | -           | -        | -        | -         | -                                    |            |            |            |
| NEG0028 | 163.1455  | 25.84973 | 226.3382 | 190.9584 | 83.7352  | 246.7174 | 71.22622 | 1.112583 | 69.4487  | 43.7556  | 102.5832 | 35.95614 | 1.31633  | 75.7788  | 1.05808  | 0.051225 | 0.071956  | 0.348333     | Apigenin                                                                                          | 7-cycloside                                        | 0.824    | 402.0983 | C20H18O       | NA          | 10          | -           | -        | -        | -         | -                                    |            |            |            |
| NEG0028 | 101.2314  | 53.94247 | 121.6293 | 86.60557 | 67.36516 | 72.64094 | 168.7529 | 162.8555 | 86.70727 | 231.5771 | 40.16621 | 289.2178 | 83.89614 | 183.3544 | 12.7888  | 0.007844 | 0.013965  | 0.410186     | Opin                                                                                              | N-(1S)-4-Carbamin                                  | 2.868    | 404.1667 | C25H24O       | 482-53-1    | 10          | -           | -        | -        | -         | -                                    |            |            |            |
| NEG0028 | 8.783878  | 591.491  | 3.144998 | 0.132373 | 0.510643 | 4.378429 | 49.23806 | 56.28549 | 50.98084 | 33.57189 | 40.44614 | 67.20140 | 15.83032 | 49.00197 | 3.250817 | 4.53E-06 | 4.80E-05  | 0.317085     | Lancerin                                                                                          |                                                    | 2.114    | 406.0858 | C19H18O       | 81991-99-3  | 3           | Neoflavo-   | -        | -        | -         | -                                    | -          |            |            |
| NEG0029 | 96.67532  | 54.86787 | 116.1387 | 76.14994 | 77.0209  | 60.83932 | 37.70682 | 31.58602 | 30.91035 | 43.46962 | 35.21717 | 46.74794 | 80.2027  | 37.60632 | -1.0941  | 0.003137 | 0.003078  | 0.278964     | Malmeisins                                                                                        |                                                    | 2.851    | 406.1741 | C25H26O       | 18483-64-2  | 9           | Purine      | nuC00206 | ko01100/ | Global    | ac                                   | Metabolism |            |            |
| NEG0029 | 6.303532  | 6.68714  | 4.763146 | 3.510693 | 4.489947 | 46.25766 | 24.53702 | 19.77458 | 17.36331 | 25.34606 | 18.51272 | 15.20247 | 25.29861 | 25.29861 | -1.0941  | 0.003137 | 0.003078  | 0.278964     | malDAP                                                                                            |                                                    | 8.74     | 411.0331 | C10H15N       | 326322      | 3           | Purine      | nuC00206 | ko011    |           |                                      |            |            |            |

[illegible]

|          |          |          |          |          |          |           |          |          |          |          |          |          |          |          |                  |           |          |                                  |                                            |                         |          |           |          |            |                |                 |                 |           |                                                                                |            |
|----------|----------|----------|----------|----------|----------|-----------|----------|----------|----------|----------|----------|----------|----------|----------|------------------|-----------|----------|----------------------------------|--------------------------------------------|-------------------------|----------|-----------|----------|------------|----------------|-----------------|-----------------|-----------|--------------------------------------------------------------------------------|------------|
| POSO0048 | 294.8154 | 168.5048 | 222.0014 | 179.2235 | 135.7389 | 171.0871  | 243.4095 | 227.2924 | 224.5782 | 222.0945 | 182.2788 | 214.2191 | 195.23   | 218.9788 | 0.165616         | 0.352615  | 0.423916 | 0.095015                         | Allylsine                                  | Allylsine               | 0.86     | 145.0734  | C6H11NC  | 1740725    | 3              | CarboxyliC04076 | ko01100/        | Amino ac  | Metabolism                                                                     |            |
| POSO0045 | 143.4645 | 18.57507 | 106.6628 | 105.8122 | 109.7756 | 22.8569   | 35.98181 | 12.28934 | 15.40382 | 12.18599 | 82.06134 | 64.6256  | 84.4493  | 37.09132 | -1.18695         | 0.080191  | 0.118119 | 0.252461                         | SpermidiolSpermidine                       |                         | 0.598    | 145.1573  | C7H19N3  | 124-20-9   | 4              | OrganoC00315    | ko01100/        | Amino ac  | Environmental Information Processing;Metabolism                                |            |
| POSO0056 | 649.7729 | 403.9493 | 522.9647 | 459.9042 | 308.1138 | 408.1001  | 257.3972 | 350.3191 | 285.0865 | 228.2966 | 435.8852 | 297.3911 | 458.6879 | 309.06   | -0.56963         | 0.024797  | 0.043817 | 0.506969                         | Oxoglutaralapha-Cetoglutaric a             |                         | 1.224    | 146.0212  | C5H6O5   | 328-50-2   | 2              | Keto acidC00026 | ko01100/        | Amino ac  | Metabolism                                                                     |            |
| POSO0051 | 20.46335 | 16.90934 | 10.53499 | 6.328527 | 10.26212 | 10.63683  | 47.50958 | 537.4904 | 38.64602 | 33.5432  | 43.00451 | 52.57379 | 12.52244 | 125.391  | 3.322915         | 0.201169  | 0.262651 | 0.346714                         | CoumarinCumarin                            |                         | 2.303    | 146.0362  | C9H6O2   | 91-64-5    | 3              | CoumarinC00581  | ko01110/        | Biosynthe | Metabolism                                                                     |            |
| POSO0052 | 5903.149 | 10549.08 | 11760.65 | 9336.125 | 7414.702 | 8351.599  | 7647.166 | 6591.884 | 2808.127 | 18105.23 | 8639.281 | 3375.166 | 8885.884 | 786.143  | -0.17678         | 0.680718  | 0.762505 | 0.351553                         | L-Glutam D-L-Glutamine                     |                         | 0.888    | 146.0685  | C5H9NO2  | 56-85-0    | 4              | CarboxyliC00064 | ko01100/        | Amino ac  | Environmental Information Processing;Genetic Information Processing;Metabolism |            |
| POSO0053 | 756.8134 | 487.2343 | 493.7944 | 444.0086 | 355.6794 | 425.3543  | 991.5709 | 890.9201 | 856.2896 | 712.1297 | 1193.137 | 851.2532 | 493.8141 | 914.2633 | 0.888674         | 0.000683  | 0.022351 | 0.997788                         | L-Lysine DL-Lysine                         |                         | 0.687    | 146.1049  | C6H14N2  | 56-87-0    | 4              | CarboxyliC00047 | ko01100/        | Amino ac  | Environmental Information Processing;Genetic Information Processing;Metabolism |            |
| POSO0054 | 5152.525 | 3732.65  | 4379.335 | 3579.009 | 2523.523 | 3508.914  | 3774.609 | 2894.102 | 2746.89  | 4497.504 | 4258.266 | 3609.608 | 3812.699 | 304.163  | -0.07076         | 0.701528  | 0.704284 | 0.226118                         | L-Glutam L-Glutamic acid                   |                         | 0.8      | 147.0525  | C5H9NO2  | 56-86-0    | 4              | CarboxyliC00025 | ko01100/        | Amino ac  | Environmental Information Processing;Genetic Information Processing;Metabolism |            |
| POSO0055 | 12213.06 | 7338.08  | 7389.719 | 4361.251 | 17548.3  | 6139.571  | 3883.924 | 4049.851 | 1299.386 | 1876.257 | 2746.237 | 2866.986 | 9164.96  | 2787.107 | -0.17337         | 0.010594  | 0.20062  | 0.374226                         | Gamma(4R)-5-Hydroxy-L-lysine               |                         | 0.862    | 147.0891  | C6H13NC  | 53185-12-9 | 3              | Piperidin-      | -               | -         | -                                                                              |            |
| POSO0056 | 29.99153 | 12.89943 | 18.88657 | 18.32584 | 8.26685  | 12.84089  | 9.762713 | 7.391213 | 8.04138  | 7.985235 | 26.899   | 8.154067 | 10.65738 | 11.3669  | -0.57016         | 0.237406  | 0.306603 | 0.066603                         | CuminalolEL960000                          |                         | 2.272    | 148.0882  | C10H12O  | 122-03-2   | 4              | Prend lipC06577 | ko01120/        | Global    | an                                                                             | Metabolism |
| POSO0057 | 866.705  | 838.9514 | 899.3899 | 514.7655 | 461.2676 | 708.2691  | 917.4646 | 1018.074 | 1134.785 | 660.6202 | 378.952  | 1022.697 | 174.7814 | 1022.969 | 0.51796          | 0.032027  | 0.054843 | 0.72199                          | L-Methiol(-)-Methionine                    |                         | 0.858    | 149.0505  | C5H11NC  | 63-68-3    | 3              | CarboxyliC00073 | ko01100/        | Amino ac  | Genetic Information Processing;Metabolism                                      |            |
| POSO0058 | 30.35647 | 10.36248 | 17.69534 | 16.50222 | 41.5443  | 9.49604   | 95.38782 | 106.0854 | 95.8277  | 33.81083 | 99.17031 | 95.55056 | 21.0032  | 72.59974 | 1.787458         | 0.003442  | 0.008693 | 0.345138                         | Asparaginsparaginic acid                   |                         | 1.257    | 149.9802  | C6H14O2S | 118374     | 3              | Dithiolan-      | -               | -         | -                                                                              |            |
| POSO0059 | 35.02563 | 9.69125  | 26.60794 | 18.4273  | 44.79783 | 15.253134 | 24.551   | 18.7252  | 13.87845 | 17.95637 | 64.46193 | 173.1964 | 1.87947  | 0.091945 | 0.091197         | 0.258149  | Guanine  | Guanine                          |                                            | 1.147                   | 151.0489 | C5H5N5    | 73-40-5  | 3          | ImidazopC00242 | ko01100/        | Global          | an        | Metabolism                                                                     |            |
| POSO0066 | 17.85928 | 10.65672 | 13.13325 | 10.18685 | 8.657664 | 11.93122  | 21.46694 | 19.37288 | 20.53106 | 14.12289 | 20.70457 | 18.31877 | 12.07083 | 19.05663 | 0.658786         | 0.002144  | 0.005787 | 0.118632                         | p-Hydroxyphenyllactic acid                 |                         | 1.223    | 152.0459  | C8H8O3   | 156-38-7   | 9              | Phenols C00642  | ko01120/        | Amino ac  | Metabolism                                                                     |            |
| POSO0061 | 14.43192 | 31.11802 | 32.70562 | 3.645472 | 23.2275  | 24.40588  | 31.22217 | 33.68766 | 27.63109 | 25.29317 | 32.95627 | 28.26176 | 19.92261 | 29.92355 | 0.586961         | 0.094158  | 0.135638 | 0.125251                         | 3-Phenylpropyl-3-(4,4-dihydroxyph-2-methyl |                         | 2        | 152.1195  | C10H16O  | 2102-58-1  | 1              | Order lipC00964 | ko01110/        | Global    | an                                                                             | Metabolism |
| POSO0062 | 96.96422 | 53.34929 | 50.63626 | 50.37829 | 47.10427 | 51.90268  | 18.82423 | 179.5414 | 108.732  | 182.0823 | 181.1386 | 144.93   | 58.35425 | 164.1113 | 1.491764         | 3.29E-05  | 0.002099 | 0.523762                         | L-HistidinL-Histidine                      |                         | 0.694    | 155.0689  | C6H9N3   | 71-00-1    | 3              | CarboxyliC00135 | ko01100/        | Amino ac  | Environmental Information Processing;Genetic Information Processing;Metabolism |            |
| POSO0063 | 1997.048 | 1692.52  | 1678.954 | 1468.319 | 1746.752 | 1842.228  | 1744.204 | 1717.933 | 1987.731 | 1899.553 | 1788.962 | 2414.991 | 1443.335 | 1660.554 | 1780.417         | 0.171459  | 0.21149  | 0.275527                         | 0.507309                                   | Phosphorylphosphocolate |          | 14.512    | 155.9829 | C2HSO6     | 13147-57-5     | 3               | Organic pC00988 | ko01100/  | Carboxhyd                                                                      | Metabolism |
| POSO0064 | 17.37523 | 49.01314 | 18.47432 | 13.26744 | 7.149943 | 62.10533  | 30.01062 | 38.61451 | 21.62967 | 21.3831  | 39.33381 | 23.40771 | 27.8957  | 29.06357 | 0.059073         | 0.09639   | 0.934983 | 0.025575                         | 6-Methox-6-Methoxyquinoline                |                         | 2.791    | 159.0677  | C10H9N   | 5263-87-6  | 3              | -               | -               | -         | -                                                                              |            |
| POSO0065 | 105.3211 | 41.20419 | 93.36255 | 75.20389 | 33.40641 | 43.75532  | 75.78998 | 73.26876 | 49.20441 | 61.54724 | 63.91121 | 59.1546  | 65.87551 | 62.6618  | -0.07344         | 0.805313  | 0.843843 | 0.033183                         | CalsyestiGuaucoline                        |                         | 0.859    | 159.0887  | C7H13NC  | 131580-36- | 5              | Tropane cI00850 | ko00960/        | Biosynthe | Metabolism                                                                     |            |
| POSO0066 | 59.04901 | 38.04528 | 58.4528  | 48.23513 | 26.85423 | 33.87607  | 35.9949  | 48.03328 | 34.12725 | 31.59242 | 61.22931 | 26.6147  | 43.18548 | 39.59864 | -0.1251          | 0.630625  | 0.682829 | 0.027897                         | L-2-Amin.alpha.-Aminoadipic                |                         | 1.221    | 161.0681  | C6H11NC  | 1118-90-7  | 4              | CarboxyliC00956 | ko01100/        | Amino ac  | Metabolism                                                                     |            |
| POSO0067 | 3585.952 | 2850.66  | 3459.787 | 2784.751 | 1960.917 | 3034.275  | 5565.155 | 4824.727 | 2946.058 | 4499.126 | 50.0099  | 0.0026   | 0.006721 | 1.924889 | LevoLugLugucosan |           | 0.829    | 162.0521                         | C6H10O5                                    | 498-07-7                | 4        | Oxepanes- | -        | -          | -              |                 |                 |           |                                                                                |            |
| POSO0068 | 2127.344 | 1501.15  | 827.5239 | 1744.649 | 527.4563 | 67.9955   | 2744.998 | 2418.412 | 1621.397 | 2818.359 | 2645.629 | 2585.582 | 1234.353 | 2472.396 | 1.002155         | 0.003011  | 0.007682 | 1.642431                         | D-1,5-Anil,5-Anhydro-L-Arab                |                         | 1.099    | 162.0521  | C6H10O5  | 75414-43-6 | 3              | Carboxyli-      | -               | -         | -                                                                              |            |
| POSO0069 | 14.8482  | 5.679948 | 7.549314 | 7.147268 | 8.454976 | 5.352548  | 11.41592 | 45.98167 | 3.64558  | 8.752113 | 5.97207  | 17.43864 | 8.171876 | 5.92637  | 0.287166         | 0.358409  | 0.078571 | Methyl cil-3-Methyl-3-sulfinylar |                                            | 1.892                   | 162.0707 | C10H10O   | 103-26-4 | 16         | Cinnamic-      | -               | -               | -         |                                                                                |            |
| POSO0072 | 62.62342 | 9.981695 | 17.09948 | 14.68207 | 21.76893 | 16.91929  | 36.64637 | 20.60914 | 24.34672 | 11.73526 | 42.60076 | 32.61404 | 23.84581 | 28.80925 | 0.236426         | 0.653028  | 0.702435 | 0.034071                         | L-Nicotin(+)-nicotine                      |                         | 14.473   | 162.1151  | C10H14N  | 20033      | 3              | PyridinesC16150 | ko01120/        | Global    | an                                                                             | Metabolism |
| POSO0071 | 125.1136 | 85.41032 | 71.7896  | 61.89757 | 39.76342 | 77.13481  | 38.46201 | 17.48554 | 35.21839 | 47.29449 | 41.23373 | 31.6605  | 76.8431  | 35.22578 | -0.12528         | 0.007     | 0.014763 | 0.380108                         | Homothomomethomethionine                   |                         | 0.472    | 163.066   | C6H13NC  | 25148-30-5 | 3              | CarboxyliC17213 | ko01110/        | Biosynthe | Metabolism                                                                     |            |
| POSO0072 | 181.676  | 119.394  | 139.2408 | 113.0002 | 101.0363 | 113.409   | 338.7923 | 374.7769 | 243.193  | 268.7285 | 378.0491 | 253.2748 | 126.6201 | 309.4688 | 1.289287         | 6.58E-05  | 0.000444 | 0.689449                         | EthionineL-Ethionine                       |                         | 1.226    | 163.066   | C6H13NC  | 13073-35-3 | 4              | -               | -               | -         | -                                                                              |            |
| POSO0073 | 1773.141 | 944.6804 | 997.398  | 789.7015 | 661.4187 | 988.0963  | 2226.72  | 2063.873 | 1848.162 | 1939.032 | 2334.767 | 1782.727 | 1022.359 | 2032.547 | 0.993547         | 0.000241  | 0.002161 | 0.159444                         | Phenylpropyl-3-(4,4-dihydroxyph-           |                         | 1.248    | 164.0467  | C9H8O3   | 156-06-9   | 3              | Benzene cC00166 | ko01100/        | Amino ac  | Metabolism                                                                     |            |
| POSO0074 | 132.2058 | 77.07222 | 20.21085 | 2.516539 | 53.47943 | 20.22601  | 49.8325  | 641.8776 | 536.6687 | 338.1331 | 429.893  | 521.7685 | 50.94331 | 494.0274 | 3.27798          | 2.39E-06  | 4.95E-05 | 1.042744                         | 2-Hydroxycinnamic                          |                         | 2.101    | 164.0467  | C9H8O3   | 583-17-5   | 3              | CinnamicC001772 | ko01100/        | Amino ac  | Metabolism                                                                     |            |
| POSO0075 | 49.93052 | 37.57626 | 71.16578 | 19.38171 | 21.41636 | 24.34058  | 1155.385 | 860.6103 | 93.1313  | 129.9233 | 2488.274 | 1410.427 | 25.63517 | 14.10427 | 5.734767         | 0.000227  | 0.001201 | 0.896633                         | 4-Coumaric acid                            |                         | 2.649    | 164.0468  | C9H8O3   | 501-98-4   | 3              | CinnamicC00811  | ko01100/        | Amino ac  | Metabolism                                                                     |            |
| POSO0077 | 717.7824 | 411.2252 | 530.5431 | 443.588  | 333.0428 | 496.5307  | 318.6196 | 347.666  | 299.9778 | 346.5536 | 384.3738 | 401.8783 | 488.2702 | 349.845  | -0.4825          | 0.02369   | 0.04843  | 0.505901                         | S-2-Amin-5-Aminoethyl-L-cys                |                         | 0.643    | 164.0612  | C5H12N2  | 2936-69-8  | 5              | Carboxyli-      | -               | -         | -                                                                              |            |
| POSO0077 | 71.45608 | 33.13679 | 40.41494 | 29.94848 | 27.01275 | 43.98841  | 98.20258 | 42.2323  | 51.98814 | 98.20258 | 43.98841 | 37.76963 | 53.79642 | 42.22791 | 0.373945         | 0.0379714 | 0.064393 | 0.185427                         | cis-JasmonicFenipic acid                   |                         | 4.526    | 164.1195  | C11H16O4 | 62-61-4    | 3              | Organoo-        | -               | -         | -                                                                              |            |
| POSO0078 | 229.1197 | 138.9732 | 171.2754 | 224.2318 | 148.0732 | 46.94196  | 46.94196 | 46.94196 | 46.94196 | 42.39657 | 38.96556 | 42.84303 | 100.7603 | 130.6407 | 2.14193          | 4.40E-05  | 0.000346 | 0.612061                         | DL-Methyl-Methionine sulfox                |                         | 0.8      | 165.0454  | C5H11NC  | 3226-65-1  | 3              | Carboxyli-      | -               | -         | -                                                                              |            |
| POSO0078 | 84.23182 | 54.18582 | 59.68844 | 56.1679  | 34.22984 | 50.74627  | 132.1966 | 112.3814 | 81.50977 | 96.73924 | 115.0098 | 93.92879 | 56.4935  | 105.2948 | 0.900199         | 0.002219  | 0.000444 | 0.340178                         | 1-Methyl;Epiguanine                        |                         | 1.226    | 165.0684  | C6H7NS   | 938-85-2   | 3              | Imidazop-       | -               | -         | -                                                                              |            |
| POSO0086 | 9205.581 | 5044.205 | 5490.648 | 4670.363 | 491.405  | 5209.045  | 1602.37  | 9866.129 | 11923.72 | 13800.02 | 9747.007 | 9866.129 | 541.563  | 11668.97 | 1.050051         | 0.000124  | 0.00079  | 3.854208                         | L-Phenyl-L-Phenylalanine                   |                         | 1.678    | 165.0684  | C9H9NO   | 63-91-2    | 4              | CarboxyliC00079 | ko01100/        | Amino ac  | Environmental Information Processing;Genetic Information Processing;Metabolism |            |
| POSO0081 | 964.0938 | 527.2129 | 581.5244 | 516.1481 | 422.3859 | 521.7967  | 1370.847 | 1141.725 | 985.6212 | 1224.656 | 1420.172 | 981.9644 | 588.8513 | 1187.498 | 0.101949         | 0.000264  | 0.001218 | 1.205026                         | 1-Deoxy-13-D-4-Methyl-3-pente              |                         | 1.679    | 166.0814  | C6H14O   | 18545-96-5 | 16             | Organoo-        | -               | -         | -                                                                              |            |
| POSO0082 | 28.48651 | 14.50052 | 10.58743 | 14.44357 | 21.24081 | 15.12104  | 50.99533 | 55.51899 | 46.17415 | 37.46868 | 67.78853 | 31.85043 | 18.27797 | 48.29879 | 1.401895         | 0.000385  | 0.00161  | 0.272347                         | Pentol(2E,4E,7E)-2,4,7-Dec                 |                         | 3.276    | 166.0988  | C11H14O  | NA         | 3              | -               | -               | -         |                                                                                |            |
|          |          |          |          |          |          |           |          |          |          |          |          |          |          |          |                  |           |          |                                  |                                            |                         |          |           |          |            |                |                 |                 |           |                                                                                |            |



|         |          |          |           |          |           |          |          |          |          |          |          |          |          |          |           |          |                               |                            |                                 |          |           |            |             |            |                  |          |          |          |          |          |          |          |          |          |          |          |          |          |          |          |          |          |          |          |          |          |          |          |          |          |          |          |          |          |          |          |          |          |          |          |          |          |          |          |          |          |          |          |          |          |          |          |          |          |          |          |          |          |          |          |          |          |          |          |          |          |          |          |          |          |          |          |          |          |          |          |          |          |          |          |          |          |          |          |          |          |          |          |          |          |          |          |          |          |          |          |          |          |          |          |          |          |          |          |          |          |          |          |          |          |          |          |          |          |          |          |          |          |          |          |          |          |          |          |          |          |          |          |          |          |          |          |          |          |          |          |          |          |          |          |          |          |          |          |          |          |          |          |          |          |          |          |          |          |          |          |          |          |          |          |          |          |          |          |          |          |          |          |          |          |          |          |          |          |          |          |          |          |          |          |          |          |          |          |          |          |          |          |          |          |          |          |          |          |          |          |          |          |          |          |          |          |          |          |          |          |          |          |          |          |          |          |          |          |          |          |          |          |          |          |          |          |          |          |          |          |          |          |          |          |          |          |          |          |          |          |          |          |          |          |          |          |          |          |          |          |          |          |          |          |          |          |          |          |          |          |          |          |          |          |          |          |          |          |          |          |          |          |          |          |          |          |          |          |          |          |          |          |          |          |          |          |          |          |          |          |          |          |          |          |          |          |          |          |          |          |          |          |          |          |          |          |          |          |          |          |          |          |          |          |          |          |          |          |          |          |          |          |          |          |          |          |          |          |          |          |          |          |          |          |          |          |          |          |          |          |          |          |          |          |          |          |          |          |          |          |          |          |          |          |          |          |          |          |          |          |          |          |          |          |          |          |          |          |          |          |          |          |          |          |          |          |          |          |          |          |          |          |          |          |          |          |          |          |          |          |          |          |          |          |          |          |          |          |            |
|---------|----------|----------|-----------|----------|-----------|----------|----------|----------|----------|----------|----------|----------|----------|----------|-----------|----------|-------------------------------|----------------------------|---------------------------------|----------|-----------|------------|-------------|------------|------------------|----------|----------|----------|----------|----------|----------|----------|----------|----------|----------|----------|----------|----------|----------|----------|----------|----------|----------|----------|----------|----------|----------|----------|----------|----------|----------|----------|----------|----------|----------|----------|----------|----------|----------|----------|----------|----------|----------|----------|----------|----------|----------|----------|----------|----------|----------|----------|----------|----------|----------|----------|----------|----------|----------|----------|----------|----------|----------|----------|----------|----------|----------|----------|----------|----------|----------|----------|----------|----------|----------|----------|----------|----------|----------|----------|----------|----------|----------|----------|----------|----------|----------|----------|----------|----------|----------|----------|----------|----------|----------|----------|----------|----------|----------|----------|----------|----------|----------|----------|----------|----------|----------|----------|----------|----------|----------|----------|----------|----------|----------|----------|----------|----------|----------|----------|----------|----------|----------|----------|----------|----------|----------|----------|----------|----------|----------|----------|----------|----------|----------|----------|----------|----------|----------|----------|----------|----------|----------|----------|----------|----------|----------|----------|----------|----------|----------|----------|----------|----------|----------|----------|----------|----------|----------|----------|----------|----------|----------|----------|----------|----------|----------|----------|----------|----------|----------|----------|----------|----------|----------|----------|----------|----------|----------|----------|----------|----------|----------|----------|----------|----------|----------|----------|----------|----------|----------|----------|----------|----------|----------|----------|----------|----------|----------|----------|----------|----------|----------|----------|----------|----------|----------|----------|----------|----------|----------|----------|----------|----------|----------|----------|----------|----------|----------|----------|----------|----------|----------|----------|----------|----------|----------|----------|----------|----------|----------|----------|----------|----------|----------|----------|----------|----------|----------|----------|----------|----------|----------|----------|----------|----------|----------|----------|----------|----------|----------|----------|----------|----------|----------|----------|----------|----------|----------|----------|----------|----------|----------|----------|----------|----------|----------|----------|----------|----------|----------|----------|----------|----------|----------|----------|----------|----------|----------|----------|----------|----------|----------|----------|----------|----------|----------|----------|----------|----------|----------|----------|----------|----------|----------|----------|----------|----------|----------|----------|----------|----------|----------|----------|----------|----------|----------|----------|----------|----------|----------|----------|----------|----------|----------|----------|----------|----------|----------|----------|----------|----------|----------|----------|----------|----------|----------|----------|----------|----------|----------|----------|----------|----------|----------|----------|----------|----------|----------|----------|----------|----------|----------|----------|----------|----------|----------|----------|----------|----------|----------|----------|----------|----------|----------|----------|----------|----------|----------|----------|----------|----------|----------|----------|----------|----------|----------|----------|----------|----------|----------|----------|----------|----------|----------|----------|----------|----------|----------|----------|----------|----------|----------|----------|----------|----------|----------|----------|----------|----------|----------|----------|----------|----------|------------|
| PO00132 | 62.64109 | 20.11309 | 14.31743  | 15.25398 | 13.86378  | 16.06934 | 12.91525 | 14.29535 | 17.60827 | 15.15214 | 19.83504 | 14.0165  | 16.70999 | 15.30386 | -0.1268   | 0.05158  | 0.08729                       | 0.032095                   | Tetradecyl-L-Tetradecyloleamine | 5.11     | 213.2447  | C14H31N    | 2016-42-4   | 4          | -                |          |          |          |          |          |          |          |          |          |          |          |          |          |          |          |          |          |          |          |          |          |          |          |          |          |          |          |          |          |          |          |          |          |          |          |          |          |          |          |          |          |          |          |          |          |          |          |          |          |          |          |          |          |          |          |          |          |          |          |          |          |          |          |          |          |          |          |          |          |          |          |          |          |          |          |          |          |          |          |          |          |          |          |          |          |          |          |          |          |          |          |          |          |          |          |          |          |          |          |          |          |          |          |          |          |          |          |          |          |          |          |          |          |          |          |          |          |          |          |          |          |          |          |          |          |          |          |          |          |          |          |          |          |          |          |          |          |          |          |          |          |          |          |          |          |          |          |          |          |          |          |          |          |          |          |          |          |          |          |          |          |          |          |          |          |          |          |          |          |          |          |          |          |          |          |          |          |          |          |          |          |          |          |          |          |          |          |          |          |          |          |          |          |          |          |          |          |          |          |          |          |          |          |          |          |          |          |          |          |          |          |          |          |          |          |          |          |          |          |          |          |          |          |          |          |          |          |          |          |          |          |          |          |          |          |          |          |          |          |          |          |          |          |          |          |          |          |          |          |          |          |          |          |          |          |          |          |          |          |          |          |          |          |          |          |          |          |          |          |          |          |          |          |          |          |          |          |          |          |          |          |          |          |          |          |          |          |          |          |          |          |          |          |          |          |          |          |          |          |          |          |          |          |          |          |          |          |          |          |          |          |          |          |          |          |          |          |          |          |          |          |          |          |          |          |          |          |          |          |          |          |          |          |          |          |          |          |          |          |          |          |          |          |          |          |          |          |          |          |          |          |          |          |          |          |          |          |          |          |          |          |          |          |          |          |          |          |          |          |          |          |          |          |          |          |          |          |          |          |          |          |          |          |          |          |          |          |          |          |            |
| PO00133 | 26.40092 | 363.0745 | 40.4784   | 39.5747  | 371.6442  | 34.8587  | 495.1461 | 477.3641 | 477.9633 | 475.9349 | 572.4488 | 572.4488 | 572.4488 | 516.3401 | 0.322165  | 0.05313  | 0.048629                      | 0.339214                   | Valylprolyl Valylproline        | 1.558    | 214.131   | C10H18N    | 2048-27-1   | 3          | Carboxylic       |          |          |          |          |          |          |          |          |          |          |          |          |          |          |          |          |          |          |          |          |          |          |          |          |          |          |          |          |          |          |          |          |          |          |          |          |          |          |          |          |          |          |          |          |          |          |          |          |          |          |          |          |          |          |          |          |          |          |          |          |          |          |          |          |          |          |          |          |          |          |          |          |          |          |          |          |          |          |          |          |          |          |          |          |          |          |          |          |          |          |          |          |          |          |          |          |          |          |          |          |          |          |          |          |          |          |          |          |          |          |          |          |          |          |          |          |          |          |          |          |          |          |          |          |          |          |          |          |          |          |          |          |          |          |          |          |          |          |          |          |          |          |          |          |          |          |          |          |          |          |          |          |          |          |          |          |          |          |          |          |          |          |          |          |          |          |          |          |          |          |          |          |          |          |          |          |          |          |          |          |          |          |          |          |          |          |          |          |          |          |          |          |          |          |          |          |          |          |          |          |          |          |          |          |          |          |          |          |          |          |          |          |          |          |          |          |          |          |          |          |          |          |          |          |          |          |          |          |          |          |          |          |          |          |          |          |          |          |          |          |          |          |          |          |          |          |          |          |          |          |          |          |          |          |          |          |          |          |          |          |          |          |          |          |          |          |          |          |          |          |          |          |          |          |          |          |          |          |          |          |          |          |          |          |          |          |          |          |          |          |          |          |          |          |          |          |          |          |          |          |          |          |          |          |          |          |          |          |          |          |          |          |          |          |          |          |          |          |          |          |          |          |          |          |          |          |          |          |          |          |          |          |          |          |          |          |          |          |          |          |          |          |          |          |          |          |          |          |          |          |          |          |          |          |          |          |          |          |          |          |          |          |          |          |          |          |          |          |          |          |          |          |          |          |          |          |          |          |          |          |          |          |          |          |          |          |          |          |          |            |
| PO00134 | 5.11376  | 2.735264 | 5.01581   | 2.739222 | 0.874141  | 4.391302 | 3.393818 | 5.816944 | 3.704606 | 4.029717 | 6.389572 | 4.088894 | 3.643145 | 4.7505   | 0.276168  | 0.28954  | 0.358635                      | 0.031961                   | SuccinylplSuccinyl proline      | 1.866    | 215.0785  | C9H13N     | 63250-32-8  | 4          | -                |          |          |          |          |          |          |          |          |          |          |          |          |          |          |          |          |          |          |          |          |          |          |          |          |          |          |          |          |          |          |          |          |          |          |          |          |          |          |          |          |          |          |          |          |          |          |          |          |          |          |          |          |          |          |          |          |          |          |          |          |          |          |          |          |          |          |          |          |          |          |          |          |          |          |          |          |          |          |          |          |          |          |          |          |          |          |          |          |          |          |          |          |          |          |          |          |          |          |          |          |          |          |          |          |          |          |          |          |          |          |          |          |          |          |          |          |          |          |          |          |          |          |          |          |          |          |          |          |          |          |          |          |          |          |          |          |          |          |          |          |          |          |          |          |          |          |          |          |          |          |          |          |          |          |          |          |          |          |          |          |          |          |          |          |          |          |          |          |          |          |          |          |          |          |          |          |          |          |          |          |          |          |          |          |          |          |          |          |          |          |          |          |          |          |          |          |          |          |          |          |          |          |          |          |          |          |          |          |          |          |          |          |          |          |          |          |          |          |          |          |          |          |          |          |          |          |          |          |          |          |          |          |          |          |          |          |          |          |          |          |          |          |          |          |          |          |          |          |          |          |          |          |          |          |          |          |          |          |          |          |          |          |          |          |          |          |          |          |          |          |          |          |          |          |          |          |          |          |          |          |          |          |          |          |          |          |          |          |          |          |          |          |          |          |          |          |          |          |          |          |          |          |          |          |          |          |          |          |          |          |          |          |          |          |          |          |          |          |          |          |          |          |          |          |          |          |          |          |          |          |          |          |          |          |          |          |          |          |          |          |          |          |          |          |          |          |          |          |          |          |          |          |          |          |          |          |          |          |          |          |          |          |          |          |          |          |          |          |          |          |          |          |          |          |          |          |          |          |          |          |          |          |          |          |          |          |          |          |          |            |
| PO00137 | 39.01332 | 39.66362 | 40.37689  | 44.5638  | 81.84333  | 45.59474 | 44.33843 | 43.5245  | 84.78154 | 24.19731 | 71.66229 | 51.31671 | 46.84598 | 47.4606  | 0.900798  | 0.254885 | 0.324309                      | 0.19087                    | N-Nonan-N-Nonaronylglycine      | 3.267    | 215.5114  | C11H21NN   | -           | 3          | Carboxylic       |          |          |          |          |          |          |          |          |          |          |          |          |          |          |          |          |          |          |          |          |          |          |          |          |          |          |          |          |          |          |          |          |          |          |          |          |          |          |          |          |          |          |          |          |          |          |          |          |          |          |          |          |          |          |          |          |          |          |          |          |          |          |          |          |          |          |          |          |          |          |          |          |          |          |          |          |          |          |          |          |          |          |          |          |          |          |          |          |          |          |          |          |          |          |          |          |          |          |          |          |          |          |          |          |          |          |          |          |          |          |          |          |          |          |          |          |          |          |          |          |          |          |          |          |          |          |          |          |          |          |          |          |          |          |          |          |          |          |          |          |          |          |          |          |          |          |          |          |          |          |          |          |          |          |          |          |          |          |          |          |          |          |          |          |          |          |          |          |          |          |          |          |          |          |          |          |          |          |          |          |          |          |          |          |          |          |          |          |          |          |          |          |          |          |          |          |          |          |          |          |          |          |          |          |          |          |          |          |          |          |          |          |          |          |          |          |          |          |          |          |          |          |          |          |          |          |          |          |          |          |          |          |          |          |          |          |          |          |          |          |          |          |          |          |          |          |          |          |          |          |          |          |          |          |          |          |          |          |          |          |          |          |          |          |          |          |          |          |          |          |          |          |          |          |          |          |          |          |          |          |          |          |          |          |          |          |          |          |          |          |          |          |          |          |          |          |          |          |          |          |          |          |          |          |          |          |          |          |          |          |          |          |          |          |          |          |          |          |          |          |          |          |          |          |          |          |          |          |          |          |          |          |          |          |          |          |          |          |          |          |          |          |          |          |          |          |          |          |          |          |          |          |          |          |          |          |          |          |          |          |          |          |          |          |          |          |          |          |          |          |          |          |          |          |          |          |          |          |          |          |          |          |          |          |          |          |          |          |          |            |
| PO00138 | 40.01672 | 2.265941 | 1.6795318 | 2.903485 | 14.019159 | 9.927346 | 4.232635 | 2.601069 | 80.87268 | 1.86453  | 3.896222 | 1.84022  | 12.66707 | 15.58846 | 0.326543  | 0.825387 | 0.859768                      | 0.018912                   | L-1,2,3,4;1,2,3,4-tetrahydro-β  | 4.598    | 216.0889  | C12H21N    | 2438-90-4   | 4          | Indoles ar-      |          |          |          |          |          |          |          |          |          |          |          |          |          |          |          |          |          |          |          |          |          |          |          |          |          |          |          |          |          |          |          |          |          |          |          |          |          |          |          |          |          |          |          |          |          |          |          |          |          |          |          |          |          |          |          |          |          |          |          |          |          |          |          |          |          |          |          |          |          |          |          |          |          |          |          |          |          |          |          |          |          |          |          |          |          |          |          |          |          |          |          |          |          |          |          |          |          |          |          |          |          |          |          |          |          |          |          |          |          |          |          |          |          |          |          |          |          |          |          |          |          |          |          |          |          |          |          |          |          |          |          |          |          |          |          |          |          |          |          |          |          |          |          |          |          |          |          |          |          |          |          |          |          |          |          |          |          |          |          |          |          |          |          |          |          |          |          |          |          |          |          |          |          |          |          |          |          |          |          |          |          |          |          |          |          |          |          |          |          |          |          |          |          |          |          |          |          |          |          |          |          |          |          |          |          |          |          |          |          |          |          |          |          |          |          |          |          |          |          |          |          |          |          |          |          |          |          |          |          |          |          |          |          |          |          |          |          |          |          |          |          |          |          |          |          |          |          |          |          |          |          |          |          |          |          |          |          |          |          |          |          |          |          |          |          |          |          |          |          |          |          |          |          |          |          |          |          |          |          |          |          |          |          |          |          |          |          |          |          |          |          |          |          |          |          |          |          |          |          |          |          |          |          |          |          |          |          |          |          |          |          |          |          |          |          |          |          |          |          |          |          |          |          |          |          |          |          |          |          |          |          |          |          |          |          |          |          |          |          |          |          |          |          |          |          |          |          |          |          |          |          |          |          |          |          |          |          |          |          |          |          |          |          |          |          |          |          |          |          |          |          |          |          |          |          |          |          |          |          |          |          |          |          |          |          |          |          |          |          |            |
| PO00139 | 155.6214 | 95.47525 | 12.2879   | 103.465  | 64.61989  | 87.46197 | 103.826  | 81.0673  | 87.06213 | 86.55669 | 110.9773 | 92.74013 | 105.0954 | 58.4594  | 0.16021   | 0.440653 | 0.507373                      | 0.036919                   | Prolyl-Thr-pro-thr              | 0.855    | 216.111   | C9H16N2NA  | -           | 4          | Carboxylic       |          |          |          |          |          |          |          |          |          |          |          |          |          |          |          |          |          |          |          |          |          |          |          |          |          |          |          |          |          |          |          |          |          |          |          |          |          |          |          |          |          |          |          |          |          |          |          |          |          |          |          |          |          |          |          |          |          |          |          |          |          |          |          |          |          |          |          |          |          |          |          |          |          |          |          |          |          |          |          |          |          |          |          |          |          |          |          |          |          |          |          |          |          |          |          |          |          |          |          |          |          |          |          |          |          |          |          |          |          |          |          |          |          |          |          |          |          |          |          |          |          |          |          |          |          |          |          |          |          |          |          |          |          |          |          |          |          |          |          |          |          |          |          |          |          |          |          |          |          |          |          |          |          |          |          |          |          |          |          |          |          |          |          |          |          |          |          |          |          |          |          |          |          |          |          |          |          |          |          |          |          |          |          |          |          |          |          |          |          |          |          |          |          |          |          |          |          |          |          |          |          |          |          |          |          |          |          |          |          |          |          |          |          |          |          |          |          |          |          |          |          |          |          |          |          |          |          |          |          |          |          |          |          |          |          |          |          |          |          |          |          |          |          |          |          |          |          |          |          |          |          |          |          |          |          |          |          |          |          |          |          |          |          |          |          |          |          |          |          |          |          |          |          |          |          |          |          |          |          |          |          |          |          |          |          |          |          |          |          |          |          |          |          |          |          |          |          |          |          |          |          |          |          |          |          |          |          |          |          |          |          |          |          |          |          |          |          |          |          |          |          |          |          |          |          |          |          |          |          |          |          |          |          |          |          |          |          |          |          |          |          |          |          |          |          |          |          |          |          |          |          |          |          |          |          |          |          |          |          |          |          |          |          |          |          |          |          |          |          |          |          |          |          |          |          |          |          |          |          |          |          |          |          |          |          |          |          |          |          |            |
| PO00144 | 65.83112 | 41.05175 | 45.29359  | 38.58622 | 28.39858  | 42.9265  | 47.81947 | 47.44874 | 43.93146 | 43.53579 | 50.49217 | 28.98262 | 43.6796  | 45.36837 | 0.0756401 | 0.795315 | 0.013296                      | β-Alanyl-β-Ala-Lys         | 0.664                           | 217.1419 | C9H19N2NA | -          | 3           | -          |                  |          |          |          |          |          |          |          |          |          |          |          |          |          |          |          |          |          |          |          |          |          |          |          |          |          |          |          |          |          |          |          |          |          |          |          |          |          |          |          |          |          |          |          |          |          |          |          |          |          |          |          |          |          |          |          |          |          |          |          |          |          |          |          |          |          |          |          |          |          |          |          |          |          |          |          |          |          |          |          |          |          |          |          |          |          |          |          |          |          |          |          |          |          |          |          |          |          |          |          |          |          |          |          |          |          |          |          |          |          |          |          |          |          |          |          |          |          |          |          |          |          |          |          |          |          |          |          |          |          |          |          |          |          |          |          |          |          |          |          |          |          |          |          |          |          |          |          |          |          |          |          |          |          |          |          |          |          |          |          |          |          |          |          |          |          |          |          |          |          |          |          |          |          |          |          |          |          |          |          |          |          |          |          |          |          |          |          |          |          |          |          |          |          |          |          |          |          |          |          |          |          |          |          |          |          |          |          |          |          |          |          |          |          |          |          |          |          |          |          |          |          |          |          |          |          |          |          |          |          |          |          |          |          |          |          |          |          |          |          |          |          |          |          |          |          |          |          |          |          |          |          |          |          |          |          |          |          |          |          |          |          |          |          |          |          |          |          |          |          |          |          |          |          |          |          |          |          |          |          |          |          |          |          |          |          |          |          |          |          |          |          |          |          |          |          |          |          |          |          |          |          |          |          |          |          |          |          |          |          |          |          |          |          |          |          |          |          |          |          |          |          |          |          |          |          |          |          |          |          |          |          |          |          |          |          |          |          |          |          |          |          |          |          |          |          |          |          |          |          |          |          |          |          |          |          |          |          |          |          |          |          |          |          |          |          |          |          |          |          |          |          |          |          |          |          |          |          |          |          |          |          |          |          |          |          |          |          |          |          |            |
| PO00141 | 0.740992 | 0.57671  | 0.60099   | 0.58692  | 0.384036  | 0.400169 | 17.57977 | 27.8761  | 12.32082 | 31.94664 | 12.54195 | -        | 19.7384  | 3.402933 | 0.009019  | 0.001035 | 0.224414                      | EupatorioicEUPATORIOICHOCH | 2.511                           | 218.0935 | C13H24O   | 19013-03-7 | 4           | Carboxylic |                  |          |          |          |          |          |          |          |          |          |          |          |          |          |          |          |          |          |          |          |          |          |          |          |          |          |          |          |          |          |          |          |          |          |          |          |          |          |          |          |          |          |          |          |          |          |          |          |          |          |          |          |          |          |          |          |          |          |          |          |          |          |          |          |          |          |          |          |          |          |          |          |          |          |          |          |          |          |          |          |          |          |          |          |          |          |          |          |          |          |          |          |          |          |          |          |          |          |          |          |          |          |          |          |          |          |          |          |          |          |          |          |          |          |          |          |          |          |          |          |          |          |          |          |          |          |          |          |          |          |          |          |          |          |          |          |          |          |          |          |          |          |          |          |          |          |          |          |          |          |          |          |          |          |          |          |          |          |          |          |          |          |          |          |          |          |          |          |          |          |          |          |          |          |          |          |          |          |          |          |          |          |          |          |          |          |          |          |          |          |          |          |          |          |          |          |          |          |          |          |          |          |          |          |          |          |          |          |          |          |          |          |          |          |          |          |          |          |          |          |          |          |          |          |          |          |          |          |          |          |          |          |          |          |          |          |          |          |          |          |          |          |          |          |          |          |          |          |          |          |          |          |          |          |          |          |          |          |          |          |          |          |          |          |          |          |          |          |          |          |          |          |          |          |          |          |          |          |          |          |          |          |          |          |          |          |          |          |          |          |          |          |          |          |          |          |          |          |          |          |          |          |          |          |          |          |          |          |          |          |          |          |          |          |          |          |          |          |          |          |          |          |          |          |          |          |          |          |          |          |          |          |          |          |          |          |          |          |          |          |          |          |          |          |          |          |          |          |          |          |          |          |          |          |          |          |          |          |          |          |          |          |          |          |          |          |          |          |          |          |          |          |          |          |          |          |          |          |          |          |          |          |          |          |          |          |          |          |          |          |            |
| PO00142 | 820.2423 | 656.0199 | 598.2827  | 564.5856 | 480.1959  | 637.8576 | 490.0061 | 448.5787 | 448.5787 | 480.6145 | 448.5787 | 490.3224 | 534.8857 | 33.9307  | 0.428204  | 0.125621 | 0.175754                      | 0.308163                   | PanthoicPanthoic acid           | 1.753    | 219.1101  | C9H17N     | 137-08-4    | 2          | Alcohols         |          |          |          |          |          |          |          |          |          |          |          |          |          |          |          |          |          |          |          |          |          |          |          |          |          |          |          |          |          |          |          |          |          |          |          |          |          |          |          |          |          |          |          |          |          |          |          |          |          |          |          |          |          |          |          |          |          |          |          |          |          |          |          |          |          |          |          |          |          |          |          |          |          |          |          |          |          |          |          |          |          |          |          |          |          |          |          |          |          |          |          |          |          |          |          |          |          |          |          |          |          |          |          |          |          |          |          |          |          |          |          |          |          |          |          |          |          |          |          |          |          |          |          |          |          |          |          |          |          |          |          |          |          |          |          |          |          |          |          |          |          |          |          |          |          |          |          |          |          |          |          |          |          |          |          |          |          |          |          |          |          |          |          |          |          |          |          |          |          |          |          |          |          |          |          |          |          |          |          |          |          |          |          |          |          |          |          |          |          |          |          |          |          |          |          |          |          |          |          |          |          |          |          |          |          |          |          |          |          |          |          |          |          |          |          |          |          |          |          |          |          |          |          |          |          |          |          |          |          |          |          |          |          |          |          |          |          |          |          |          |          |          |          |          |          |          |          |          |          |          |          |          |          |          |          |          |          |          |          |          |          |          |          |          |          |          |          |          |          |          |          |          |          |          |          |          |          |          |          |          |          |          |          |          |          |          |          |          |          |          |          |          |          |          |          |          |          |          |          |          |          |          |          |          |          |          |          |          |          |          |          |          |          |          |          |          |          |          |          |          |          |          |          |          |          |          |          |          |          |          |          |          |          |          |          |          |          |          |          |          |          |          |          |          |          |          |          |          |          |          |          |          |          |          |          |          |          |          |          |          |          |          |          |          |          |          |          |          |          |          |          |          |          |          |          |          |          |          |          |          |          |          |          |          |          |          |          |          |          |            |
| PO00143 | 824.3943 | 486.9511 | 728.9602  | 728.9602 | 480.1959  | 506.427  | 572.9621 | 728.5897 | 438.258  | 61.3653  | 799.5778 | 931.7475 | 567.9844 | 67.3611  | 0.2466    | 0.376429 | 0.447824                      | 0.309465                   | (-)-Sedam-sedamide              | 2.695    | 219.1614  | C14H21N    | 497-88-1    | 4          | C10171           |          |          |          |          |          |          |          |          |          |          |          |          |          |          |          |          |          |          |          |          |          |          |          |          |          |          |          |          |          |          |          |          |          |          |          |          |          |          |          |          |          |          |          |          |          |          |          |          |          |          |          |          |          |          |          |          |          |          |          |          |          |          |          |          |          |          |          |          |          |          |          |          |          |          |          |          |          |          |          |          |          |          |          |          |          |          |          |          |          |          |          |          |          |          |          |          |          |          |          |          |          |          |          |          |          |          |          |          |          |          |          |          |          |          |          |          |          |          |          |          |          |          |          |          |          |          |          |          |          |          |          |          |          |          |          |          |          |          |          |          |          |          |          |          |          |          |          |          |          |          |          |          |          |          |          |          |          |          |          |          |          |          |          |          |          |          |          |          |          |          |          |          |          |          |          |          |          |          |          |          |          |          |          |          |          |          |          |          |          |          |          |          |          |          |          |          |          |          |          |          |          |          |          |          |          |          |          |          |          |          |          |          |          |          |          |          |          |          |          |          |          |          |          |          |          |          |          |          |          |          |          |          |          |          |          |          |          |          |          |          |          |          |          |          |          |          |          |          |          |          |          |          |          |          |          |          |          |          |          |          |          |          |          |          |          |          |          |          |          |          |          |          |          |          |          |          |          |          |          |          |          |          |          |          |          |          |          |          |          |          |          |          |          |          |          |          |          |          |          |          |          |          |          |          |          |          |          |          |          |          |          |          |          |          |          |          |          |          |          |          |          |          |          |          |          |          |          |          |          |          |          |          |          |          |          |          |          |          |          |          |          |          |          |          |          |          |          |          |          |          |          |          |          |          |          |          |          |          |          |          |          |          |          |          |          |          |          |          |          |          |          |          |          |          |          |          |          |          |          |          |          |          |          |          |          |          |          |          |          |            |
| PO00144 | 185.0015 | 148.9696 | 110.0328  | 113.5575 | 86.24731  | 132.8837 | 18.80928 | 19.5742  | 20.2661  | 15.67904 | 33.55857 | 22.74959 | 12.74743 | 21.78288 | -2.5711   | 2.04E-05 | 0.000223                      | 0.528555                   | Chrysoir(-) 3-tris-isodihomo    | 0.879    | 220.0575  | C12H21O    | 91362-90-2  | 7          | Oxanes           |          |          |          |          |          |          |          |          |          |          |          |          |          |          |          |          |          |          |          |          |          |          |          |          |          |          |          |          |          |          |          |          |          |          |          |          |          |          |          |          |          |          |          |          |          |          |          |          |          |          |          |          |          |          |          |          |          |          |          |          |          |          |          |          |          |          |          |          |          |          |          |          |          |          |          |          |          |          |          |          |          |          |          |          |          |          |          |          |          |          |          |          |          |          |          |          |          |          |          |          |          |          |          |          |          |          |          |          |          |          |          |          |          |          |          |          |          |          |          |          |          |          |          |          |          |          |          |          |          |          |          |          |          |          |          |          |          |          |          |          |          |          |          |          |          |          |          |          |          |          |          |          |          |          |          |          |          |          |          |          |          |          |          |          |          |          |          |          |          |          |          |          |          |          |          |          |          |          |          |          |          |          |          |          |          |          |          |          |          |          |          |          |          |          |          |          |          |          |          |          |          |          |          |          |          |          |          |          |          |          |          |          |          |          |          |          |          |          |          |          |          |          |          |          |          |          |          |          |          |          |          |          |          |          |          |          |          |          |          |          |          |          |          |          |          |          |          |          |          |          |          |          |          |          |          |          |          |          |          |          |          |          |          |          |          |          |          |          |          |          |          |          |          |          |          |          |          |          |          |          |          |          |          |          |          |          |          |          |          |          |          |          |          |          |          |          |          |          |          |          |          |          |          |          |          |          |          |          |          |          |          |          |          |          |          |          |          |          |          |          |          |          |          |          |          |          |          |          |          |          |          |          |          |          |          |          |          |          |          |          |          |          |          |          |          |          |          |          |          |          |          |          |          |          |          |          |          |          |          |          |          |          |          |          |          |          |          |          |          |          |          |          |          |          |          |          |          |          |          |          |          |          |          |          |          |          |          |          |          |            |
| PO00145 | 11.37565 | 9.84399  | 14.84394  | 13.56406 | 7.314616  | 4.926783 | 5.784468 | 4056.962 | 32.6628  | 37.43123 | 6532.736 | 3632.725 | 17.94673 | 4302.824 | 9.227739  | 6.66E-05 | 0.000444                      | 0.3449271                  | Snapiac-acSnapiac acid          | 2.699    | 224.0675  | C11H22O    | 530-59-6    | 4          | -                |          |          |          |          |          |          |          |          |          |          |          |          |          |          |          |          |          |          |          |          |          |          |          |          |          |          |          |          |          |          |          |          |          |          |          |          |          |          |          |          |          |          |          |          |          |          |          |          |          |          |          |          |          |          |          |          |          |          |          |          |          |          |          |          |          |          |          |          |          |          |          |          |          |          |          |          |          |          |          |          |          |          |          |          |          |          |          |          |          |          |          |          |          |          |          |          |          |          |          |          |          |          |          |          |          |          |          |          |          |          |          |          |          |          |          |          |          |          |          |          |          |          |          |          |          |          |          |          |          |          |          |          |          |          |          |          |          |          |          |          |          |          |          |          |          |          |          |          |          |          |          |          |          |          |          |          |          |          |          |          |          |          |          |          |          |          |          |          |          |          |          |          |          |          |          |          |          |          |          |          |          |          |          |          |          |          |          |          |          |          |          |          |          |          |          |          |          |          |          |          |          |          |          |          |          |          |          |          |          |          |          |          |          |          |          |          |          |          |          |          |          |          |          |          |          |          |          |          |          |          |          |          |          |          |          |          |          |          |          |          |          |          |          |          |          |          |          |          |          |          |          |          |          |          |          |          |          |          |          |          |          |          |          |          |          |          |          |          |          |          |          |          |          |          |          |          |          |          |          |          |          |          |          |          |          |          |          |          |          |          |          |          |          |          |          |          |          |          |          |          |          |          |          |          |          |          |          |          |          |          |          |          |          |          |          |          |          |          |          |          |          |          |          |          |          |          |          |          |          |          |          |          |          |          |          |          |          |          |          |          |          |          |          |          |          |          |          |          |          |          |          |          |          |          |          |          |          |          |          |          |          |          |          |          |          |          |          |          |          |          |          |          |          |          |          |          |          |          |          |          |          |          |          |          |          |          |          |          |          |            |
| PO00146 | 96.82756 | 42.91452 | 70.37066  | 84.16622 | 32.10807  | 36.86912 | 23.75371 | 14.24032 | 13.06776 | 24.72272 | 25.9832  | 12.98632 | 60.54269 | 19.12567 | -1.6644   | 0.004415 | 0.010025                      | 0.295417                   | Methyl-methyl Jasmonate         | 2.551    | 224.1404  | C13H20O    | 39924-52-2  | 3          | Fatty Acy C11512 |          |          |          |          |          |          |          |          |          |          |          |          |          |          |          |          |          |          |          |          |          |          |          |          |          |          |          |          |          |          |          |          |          |          |          |          |          |          |          |          |          |          |          |          |          |          |          |          |          |          |          |          |          |          |          |          |          |          |          |          |          |          |          |          |          |          |          |          |          |          |          |          |          |          |          |          |          |          |          |          |          |          |          |          |          |          |          |          |          |          |          |          |          |          |          |          |          |          |          |          |          |          |          |          |          |          |          |          |          |          |          |          |          |          |          |          |          |          |          |          |          |          |          |          |          |          |          |          |          |          |          |          |          |          |          |          |          |          |          |          |          |          |          |          |          |          |          |          |          |          |          |          |          |          |          |          |          |          |          |          |          |          |          |          |          |          |          |          |          |          |          |          |          |          |          |          |          |          |          |          |          |          |          |          |          |          |          |          |          |          |          |          |          |          |          |          |          |          |          |          |          |          |          |          |          |          |          |          |          |          |          |          |          |          |          |          |          |          |          |          |          |          |          |          |          |          |          |          |          |          |          |          |          |          |          |          |          |          |          |          |          |          |          |          |          |          |          |          |          |          |          |          |          |          |          |          |          |          |          |          |          |          |          |          |          |          |          |          |          |          |          |          |          |          |          |          |          |          |          |          |          |          |          |          |          |          |          |          |          |          |          |          |          |          |          |          |          |          |          |          |          |          |          |          |          |          |          |          |          |          |          |          |          |          |          |          |          |          |          |          |          |          |          |          |          |          |          |          |          |          |          |          |          |          |          |          |          |          |          |          |          |          |          |          |          |          |          |          |          |          |          |          |          |          |          |          |          |          |          |          |          |          |          |          |          |          |          |          |          |          |          |          |          |          |          |          |          |          |          |          |          |          |          |          |          |          |          |          |          |            |
| PO00147 | 103.4454 | 51.07975 | 70.37066  | 84.16622 | 32.10807  | 36.86912 | 23.75371 | 14.24032 | 13.06776 | 24.72272 | 25.9832  | 12.98632 | 60.54269 | 19.12567 | -1.6644   | 0.004415 | 0.010025                      | 0.295417                   | Methyl-methyl Jasmonate         | 3.976    | 226.1196  | C12H18O    | 125263-70-4 | 4          | Pyrans           |          |          |          |          |          |          |          |          |          |          |          |          |          |          |          |          |          |          |          |          |          |          |          |          |          |          |          |          |          |          |          |          |          |          |          |          |          |          |          |          |          |          |          |          |          |          |          |          |          |          |          |          |          |          |          |          |          |          |          |          |          |          |          |          |          |          |          |          |          |          |          |          |          |          |          |          |          |          |          |          |          |          |          |          |          |          |          |          |          |          |          |          |          |          |          |          |          |          |          |          |          |          |          |          |          |          |          |          |          |          |          |          |          |          |          |          |          |          |          |          |          |          |          |          |          |          |          |          |          |          |          |          |          |          |          |          |          |          |          |          |          |          |          |          |          |          |          |          |          |          |          |          |          |          |          |          |          |          |          |          |          |          |          |          |          |          |          |          |          |          |          |          |          |          |          |          |          |          |          |          |          |          |          |          |          |          |          |          |          |          |          |          |          |          |          |          |          |          |          |          |          |          |          |          |          |          |          |          |          |          |          |          |          |          |          |          |          |          |          |          |          |          |          |          |          |          |          |          |          |          |          |          |          |          |          |          |          |          |          |          |          |          |          |          |          |          |          |          |          |          |          |          |          |          |          |          |          |          |          |          |          |          |          |          |          |          |          |          |          |          |          |          |          |          |          |          |          |          |          |          |          |          |          |          |          |          |          |          |          |          |          |          |          |          |          |          |          |          |          |          |          |          |          |          |          |          |          |          |          |          |          |          |          |          |          |          |          |          |          |          |          |          |          |          |          |          |          |          |          |          |          |          |          |          |          |          |          |          |          |          |          |          |          |          |          |          |          |          |          |          |          |          |          |          |          |          |          |          |          |          |          |          |          |          |          |          |          |          |          |          |          |          |          |          |          |          |          |          |          |          |          |          |          |          |          |          |          |          |          |            |
| PO00148 | 214.9368 | 102.9396 | 130.116   | 110.6054 | 55.5008   | 107.1219 | 353.712  | 257.8705 | 374.2939 | 269.3919 | 349.0329 | 297.6865 | 120.2034 | 317.0138 | 1.399068  | 5.14E-05 | 0.000382                      | 0.677273                   | TraumaticNP-008952              | 4.526    | 228.1352  | C12H20O    | 6402-36-4   | 4          | Fatty Acy C16308 |          |          |          |          |          |          |          |          |          |          |          |          |          |          |          |          |          |          |          |          |          |          |          |          |          |          |          |          |          |          |          |          |          |          |          |          |          |          |          |          |          |          |          |          |          |          |          |          |          |          |          |          |          |          |          |          |          |          |          |          |          |          |          |          |          |          |          |          |          |          |          |          |          |          |          |          |          |          |          |          |          |          |          |          |          |          |          |          |          |          |          |          |          |          |          |          |          |          |          |          |          |          |          |          |          |          |          |          |          |          |          |          |          |          |          |          |          |          |          |          |          |          |          |          |          |          |          |          |          |          |          |          |          |          |          |          |          |          |          |          |          |          |          |          |          |          |          |          |          |          |          |          |          |          |          |          |          |          |          |          |          |          |          |          |          |          |          |          |          |          |          |          |          |          |          |          |          |          |          |          |          |          |          |          |          |          |          |          |          |          |          |          |          |          |          |          |          |          |          |          |          |          |          |          |          |          |          |          |          |          |          |          |          |          |          |          |          |          |          |          |          |          |          |          |          |          |          |          |          |          |          |          |          |          |          |          |          |          |          |          |          |          |          |          |          |          |          |          |          |          |          |          |          |          |          |          |          |          |          |          |          |          |          |          |          |          |          |          |          |          |          |          |          |          |          |          |          |          |          |          |          |          |          |          |          |          |          |          |          |          |          |          |          |          |          |          |          |          |          |          |          |          |          |          |          |          |          |          |          |          |          |          |          |          |          |          |          |          |          |          |          |          |          |          |          |          |          |          |          |          |          |          |          |          |          |          |          |          |          |          |          |          |          |          |          |          |          |          |          |          |          |          |          |          |          |          |          |          |          |          |          |          |          |          |          |          |          |          |          |          |          |          |          |          |          |          |          |          |          |          |          |          |          |          |          |          |          |          |          |            |
| PO00149 | 1585.361 | 928.6555 | 998.6138  | 998.6138 | 998.6138  | 998.6138 | 998.6138 | 998.6138 | 998.6138 | 998.6138 | 998.6138 | 998.6138 | 998.6138 | 998.6138 | 998.6138  | 998.6138 | 998.6138                      | 998.6138                   | 998.6138                        | 1.834    | 228.1465  | C11H20N    | 6403-35-6   | 3          | Carboxylic       |          |          |          |          |          |          |          |          |          |          |          |          |          |          |          |          |          |          |          |          |          |          |          |          |          |          |          |          |          |          |          |          |          |          |          |          |          |          |          |          |          |          |          |          |          |          |          |          |          |          |          |          |          |          |          |          |          |          |          |          |          |          |          |          |          |          |          |          |          |          |          |          |          |          |          |          |          |          |          |          |          |          |          |          |          |          |          |          |          |          |          |          |          |          |          |          |          |          |          |          |          |          |          |          |          |          |          |          |          |          |          |          |          |          |          |          |          |          |          |          |          |          |          |          |          |          |          |          |          |          |          |          |          |          |          |          |          |          |          |          |          |          |          |          |          |          |          |          |          |          |          |          |          |          |          |          |          |          |          |          |          |          |          |          |          |          |          |          |          |          |          |          |          |          |          |          |          |          |          |          |          |          |          |          |          |          |          |          |          |          |          |          |          |          |          |          |          |          |          |          |          |          |          |          |          |          |          |          |          |          |          |          |          |          |          |          |          |          |          |          |          |          |          |          |          |          |          |          |          |          |          |          |          |          |          |          |          |          |          |          |          |          |          |          |          |          |          |          |          |          |          |          |          |          |          |          |          |          |          |          |          |          |          |          |          |          |          |          |          |          |          |          |          |          |          |          |          |          |          |          |          |          |          |          |          |          |          |          |          |          |          |          |          |          |          |          |          |          |          |          |          |          |          |          |          |          |          |          |          |          |          |          |          |          |          |          |          |          |          |          |          |          |          |          |          |          |          |          |          |          |          |          |          |          |          |          |          |          |          |          |          |          |          |          |          |          |          |          |          |          |          |          |          |          |          |          |          |          |          |          |          |          |          |          |          |          |          |          |          |          |          |          |          |          |          |          |          |          |          |          |          |          |          |          |          |          |          |          |          |            |
| PO00150 | 15.76972 | 21.4749  | 23.6239   | 52.6108  | 61.09521  | 64.0168  | 1.2168   | 2.26675  | 0.362551 | 0.365182 | 2.213627 | 0.396999 | 30.5924  | 11.38655 | 4.75004   | 0.009679 | 0.019067                      | 0.225783                   | Cyclobars 160492                | 6.878    | 234.0275  | C11H18N    | 105748-58-  | 4          | Indoles ar-      |          |          |          |          |          |          |          |          |          |          |          |          |          |          |          |          |          |          |          |          |          |          |          |          |          |          |          |          |          |          |          |          |          |          |          |          |          |          |          |          |          |          |          |          |          |          |          |          |          |          |          |          |          |          |          |          |          |          |          |          |          |          |          |          |          |          |          |          |          |          |          |          |          |          |          |          |          |          |          |          |          |          |          |          |          |          |          |          |          |          |          |          |          |          |          |          |          |          |          |          |          |          |          |          |          |          |          |          |          |          |          |          |          |          |          |          |          |          |          |          |          |          |          |          |          |          |          |          |          |          |          |          |          |          |          |          |          |          |          |          |          |          |          |          |          |          |          |          |          |          |          |          |          |          |          |          |          |          |          |          |          |          |          |          |          |          |          |          |          |          |          |          |          |          |          |          |          |          |          |          |          |          |          |          |          |          |          |          |          |          |          |          |          |          |          |          |          |          |          |          |          |          |          |          |          |          |          |          |          |          |          |          |          |          |          |          |          |          |          |          |          |          |          |          |          |          |          |          |          |          |          |          |          |          |          |          |          |          |          |          |          |          |          |          |          |          |          |          |          |          |          |          |          |          |          |          |          |          |          |          |          |          |          |          |          |          |          |          |          |          |          |          |          |          |          |          |          |          |          |          |          |          |          |          |          |          |          |          |          |          |          |          |          |          |          |          |          |          |          |          |          |          |          |          |          |          |          |          |          |          |          |          |          |          |          |          |          |          |          |          |          |          |          |          |          |          |          |          |          |          |          |          |          |          |          |          |          |          |          |          |          |          |          |          |          |          |          |          |          |          |          |          |          |          |          |          |          |          |          |          |          |          |          |          |          |          |          |          |          |          |          |          |          |          |          |          |          |          |          |          |          |          |          |          |          |          |          |          |          |            |
| PO00151 | 286.6831 | 187.8187 | 216.7829  | 230.3188 | 105.6211  | 163.7651 | 226.5757 | 190.1969 | 213.1714 | 276.7829 | 211.7331 | 194.4468 | 193.1966 | 213.1714 | 276.7829  | 0.375927 | 0.447824                      | 0.115489                   | Glutaryl-glu-ser                | 0.79     | 234.0841  | C10H18N    | 25075-38-7  | 4          | Carboxylic       |          |          |          |          |          |          |          |          |          |          |          |          |          |          |          |          |          |          |          |          |          |          |          |          |          |          |          |          |          |          |          |          |          |          |          |          |          |          |          |          |          |          |          |          |          |          |          |          |          |          |          |          |          |          |          |          |          |          |          |          |          |          |          |          |          |          |          |          |          |          |          |          |          |          |          |          |          |          |          |          |          |          |          |          |          |          |          |          |          |          |          |          |          |          |          |          |          |          |          |          |          |          |          |          |          |          |          |          |          |          |          |          |          |          |          |          |          |          |          |          |          |          |          |          |          |          |          |          |          |          |          |          |          |          |          |          |          |          |          |          |          |          |          |          |          |          |          |          |          |          |          |          |          |          |          |          |          |          |          |          |          |          |          |          |          |          |          |          |          |          |          |          |          |          |          |          |          |          |          |          |          |          |          |          |          |          |          |          |          |          |          |          |          |          |          |          |          |          |          |          |          |          |          |          |          |          |          |          |          |          |          |          |          |          |          |          |          |          |          |          |          |          |          |          |          |          |          |          |          |          |          |          |          |          |          |          |          |          |          |          |          |          |          |          |          |          |          |          |          |          |          |          |          |          |          |          |          |          |          |          |          |          |          |          |          |          |          |          |          |          |          |          |          |          |          |          |          |          |          |          |          |          |          |          |          |          |          |          |          |          |          |          |          |          |          |          |          |          |          |          |          |          |          |          |          |          |          |          |          |          |          |          |          |          |          |          |          |          |          |          |          |          |          |          |          |          |          |          |          |          |          |          |          |          |          |          |          |          |          |          |          |          |          |          |          |          |          |          |          |          |          |          |          |          |          |          |          |          |          |          |          |          |          |          |          |          |          |          |          |          |          |          |          |          |          |          |          |          |          |          |          |          |          |          |          |          |          |          |          |            |
| PO00152 | 57.60503 | 36.66211 | 33.81952  | 30.91798 | 58.67996  | 30.22035 | 165.302  | 166.9171 | 46.41969 | 205.3437 | 83.68055 | 41.65107 | 138.1926 | 1.720255 | 0.000514  | 0.474343 | Valericen(-) 9β-Pentadecanoic | 4.091                      | 234.161                         | C14H27O  | 698970    | 4          | Fenol lip-  |            |                  |          |          |          |          |          |          |          |          |          |          |          |          |          |          |          |          |          |          |          |          |          |          |          |          |          |          |          |          |          |          |          |          |          |          |          |          |          |          |          |          |          |          |          |          |          |          |          |          |          |          |          |          |          |          |          |          |          |          |          |          |          |          |          |          |          |          |          |          |          |          |          |          |          |          |          |          |          |          |          |          |          |          |          |          |          |          |          |          |          |          |          |          |          |          |          |          |          |          |          |          |          |          |          |          |          |          |          |          |          |          |          |          |          |          |          |          |          |          |          |          |          |          |          |          |          |          |          |          |          |          |          |          |          |          |          |          |          |          |          |          |          |          |          |          |          |          |          |          |          |          |          |          |          |          |          |          |          |          |          |          |          |          |          |          |          |          |          |          |          |          |          |          |          |          |          |          |          |          |          |          |          |          |          |          |          |          |          |          |          |          |          |          |          |          |          |          |          |          |          |          |          |          |          |          |          |          |          |          |          |          |          |          |          |          |          |          |          |          |          |          |          |          |          |          |          |          |          |          |          |          |          |          |          |          |          |          |          |          |          |          |          |          |          |          |          |          |          |          |          |          |          |          |          |          |          |          |          |          |          |          |          |          |          |          |          |          |          |          |          |          |          |          |          |          |          |          |          |          |          |          |          |          |          |          |          |          |          |          |          |          |          |          |          |          |          |          |          |          |          |          |          |          |          |          |          |          |          |          |          |          |          |          |          |          |          |          |          |          |          |          |          |          |          |          |          |          |          |          |          |          |          |          |          |          |          |          |          |          |          |          |          |          |          |          |          |          |          |          |          |          |          |          |          |          |          |          |          |          |          |          |          |          |          |          |          |          |          |          |          |          |          |          |          |          |          |          |          |          |          |          |          |          |          |          |          |          |          |          |          |            |
| PO00153 | 14.81818 | 1.87242  | 1.880228  | 0.837642 | 1.038032  | 0.899279 | 1.038032 | 0.837642 | 1.038032 | 0.899279 | 1.038032 | 0.837642 | 1.038032 | 0.899279 | 1.038032  | 0.837642 | 1.038032                      | 0.899279                   | 1.038032                        | 0.837642 | 1.038032  | 0.899279   | 1.038032    | 0.837642   | 1.038032         | 0.899279 | 1.038032 | 0.837642 | 1.038032 | 0.899279 | 1.038032 | 0.837642 | 1.038032 | 0.899279 | 1.038032 | 0.837642 | 1.038032 | 0.899279 | 1.038032 | 0.837642 | 1.038032 | 0.899279 | 1.038032 | 0.837642 | 1.038032 | 0.899279 | 1.038032 | 0.837642 | 1.038032 | 0.899279 | 1.038032 | 0.837642 | 1.038032 | 0.899279 | 1.038032 | 0.837642 | 1.038032 | 0.899279 | 1.038032 | 0.837642 | 1.038032 | 0.899279 | 1.038032 | 0.837642 | 1.038032 | 0.899279 | 1.038032 | 0.837642 | 1.038032 | 0.899279 | 1.038032 | 0.837642 | 1.038032 | 0.899279 | 1.038032 | 0.837642 | 1.038032 | 0.899279 | 1.038032 | 0.837642 | 1.038032 | 0.899279 | 1.038032 | 0.837642 | 1.038032 | 0.899279 | 1.038032 | 0.837642 | 1.038032 | 0.899279 | 1.038032 | 0.837642 | 1.038032 | 0.899279 | 1.038032 | 0.837642 | 1.038032 | 0.899279 | 1.038032 | 0.837642 | 1.038032 | 0.899279 | 1.038032 | 0.837642 | 1.038032 | 0.899279 | 1.038032 | 0.837642 | 1.038032 | 0.899279 | 1.038032 | 0.837642 | 1.038032 | 0.899279 | 1.038032 | 0.837642 | 1.038032 | 0.899279 | 1.038032 | 0.837642 | 1.038032 | 0.899279 | 1.038032 | 0.837642 | 1.038032 | 0.899279 | 1.038032 | 0.837642 | 1.038032 | 0.899279 | 1.038032 | 0.837642 | 1.038032 | 0.899279 | 1.038032 | 0.837642 | 1.038032 | 0.899279 | 1.038032 | 0.837642 | 1.038032 | 0.899279 | 1.038032 | 0.837642 | 1.038032 | 0.899279 | 1.038032 | 0.837642 | 1.038032 | 0.899279 | 1.038032 | 0.837642 | 1.038032 | 0.899279 | 1.038032 | 0.837642 | 1.038032 | 0.899279 | 1.038032 | 0.837642 | 1.038032 | 0.899279 | 1.038032 | 0.837642 | 1.038032 | 0.899279 | 1.038032 | 0.837642 | 1.038032 | 0.899279 | 1.038032 | 0.837642 | 1.038032 | 0.899279 | 1.038032 | 0.837642 | 1.038032 | 0.899279 | 1.038032 | 0.837642 | 1.038032 | 0.899279 | 1.038032 | 0.837642 | 1.038032 | 0.899279 | 1.038032 | 0.837642 | 1.038032 | 0.899279 | 1.038032 | 0.837642 | 1.038032 | 0.899279 | 1.038032 | 0.837642 | 1.038032 | 0.899279 | 1.038032 | 0.837642 | 1.038032 | 0.899279 | 1.038032 | 0.837642 | 1.038032 | 0.899279 | 1.038032 | 0.837642 | 1.038032 | 0.899279 | 1.038032 | 0.837642 | 1.038032 | 0.899279 | 1.038032 | 0.837642 | 1.038032 | 0.899279 | 1.038032 | 0.837642 | 1.038032 | 0.899279 | 1.038032 | 0.837642 | 1.038032 | 0.899279 | 1.038032 | 0.837642 | 1.038032 | 0.899279 | 1.038032 | 0.837642 | 1.038032 | 0.899279 | 1.038032 | 0.837642 | 1.038032 | 0.899279 | 1.038032 | 0.837642 | 1.038032 | 0.899279 | 1.038032 | 0.837642 | 1.038032 | 0.899279 | 1.038032 | 0.837642 | 1.038032 | 0.899279 | 1.038032 | 0.837642 | 1.038032 | 0.899279 | 1.038032 | 0.837642 | 1.038032 | 0.899279 | 1.038032 | 0.837642 | 1.038032 | 0.899279 | 1.038032 | 0.837642 | 1.038032 | 0.899279 | 1.038032 | 0.837642 | 1.038032 | 0.899279 | 1.038032 | 0.837642 | 1.038032 | 0.899279 | 1.038032 | 0.837642 | 1.038032 | 0.899279 | 1.038032 | 0.837642 | 1.038032 | 0.899279 | 1.038032 | 0.837642 | 1.038032 | 0.899279 | 1.038032 | 0.837642 | 1.038032 | 0.899279 | 1.038032 | 0.837642 | 1.038032 | 0.899279 | 1.038032 | 0.837642 | 1.038032 | 0.899279 | 1.038032 | 0.837642 | 1.038032 | 0.899279 | 1.038032 | 0.837642 | 1.038032 | 0.899279 | 1.038032 | 0.837642 | 1.038032 | 0.899279 | 1.038032 | 0.837642 | 1.038032 | 0.899279 | 1.038032 | 0.837642 | 1.038032 | 0.899279 | 1.038032 | 0.837642 | 1.038032 | 0.899279 | 1.038032 | 0.837642 | 1.038032 | 0.899279 | 1.038032 | 0.837642 | 1.038032 | 0.899279 | 1.038032 | 0.837642 | 1.038032 | 0.899279 | 1.038032 | 0.837642 | 1.038032 | 0.899279 | 1.038032 | 0.837642 | 1.038032 | 0.899279 | 1.038032 | 0.837642 | 1.038032 | 0.899279 | 1.038032 | 0.837642 | 1.038032 | 0.899279 | 1.038032 | 0.837642 | 1.038032 | 0.899279 | 1.038032 | 0.837642 | 1.038032 | 0.899279 | 1.038032 | 0.837642 | 1.038032 | 0.899279 | 1.038032 | 0.837642 | 1.038032 | 0.899279 | 1.038032 | 0.837642 | 1.038032 | 0.899279 | 1.038032 | 0.837642 | 1.038032 | 0.899279 | 1.038032 | 0.837642 | 1.038032 | 0.899279 | 1.038032 | 0.837642 | 1.038032 | 0.899279 | 1.038032 | 0.837642 | 1.038032 | 0.899279 | 1.038032 | 0.837642 | 1.038032 | 0.899279 | 1.038032 | 0.837642 | 1.038032 | 0.899279 | 1.038032 | 0.837642 | 1.038032 | 0.899279 | 1.038032 | 0.837642 | 1.038032 | 0.899279 | 1.038032 | 0.837642 | 1.038032 | 0.899279 | 1.038032 | 0.837642 | 1.038032 | 0.899279 | 1.038032 | 0.837642 | 1.038032 | 0.899279 | 1.038032</ |

[illegible]



|          |          |          |          |          |          |          |          |          |          |          |          |          |          |          |          |          |          |          |                                                                           |        |          |          |            |                   |           |                     |                     |   |
|----------|----------|----------|----------|----------|----------|----------|----------|----------|----------|----------|----------|----------|----------|----------|----------|----------|----------|----------|---------------------------------------------------------------------------|--------|----------|----------|------------|-------------------|-----------|---------------------|---------------------|---|
| POS00306 | 0.412677 | 0.312348 | 0.33188  | 0.269741 | 0.338158 | 0.323557 | 0.498678 | 1.051551 | 1.178368 | 0.708708 | 1.012502 | 0.29473  | 1        | 1        | 0        | 0.009416 | 0.018661 | 0.029042 | Mycalami(2R)-3-(((2-Aminoethyl                                            | 7.559  | 503.2986 | C24H41N  | 115185-92- | 4 -               | -         | -                   | -                   | - |
| POS00307 | 17.04865 | 10.02859 | 6.251783 | 7.336502 | 21.69774 | 5.099452 | 106.0482 | 86.3763  | 74.60076 | 21.8856  | 122.332  | 29.06492 | 11.24379 | 73.38464 | 2.70635  | 0.004123 | 0.009562 | 0.37725  | Protobass(1 $\alpha$ ,2 $\alpha$ ,3 $\beta$ ,5 $\xi$ ,9 $\xi$ ,18 $\xi$ ) | 4.088  | 504.3427 | C30H48O  | 37905-13-8 | 4 Prenol lip-     | -         | -                   | -                   | - |
| POS00308 | 10.50964 | 9.214663 | 6.714518 | 6.106799 | 17.34728 | 7.059409 | 18.15422 | 11.73702 | 12.27164 | 11.84211 | 15.97261 | 10.11499 | 9.492052 | 13.34877 | 0.491915 | 0.098403 | 0.141131 | 0.075372 | LysoPC(1 1-Stearoyl-sn-glycer                                             | 8.907  | 523.3613 | C26H54N  | 19420-57-6 | 4 GlyceroplC04230 | ko00564// | Lipid metMetabolism |                     |   |
| POS00309 | 1.09343  | 0.743178 | 0.731822 | 0.707306 | 0.581868 | 0.670773 | 0.773083 | 0.680459 | 0.669265 | 0.568437 | 0.842007 | 0.621223 | 1        | 1        | 0        | 0.467844 | 0.531198 | 0.006739 | Diosbulbinoside F                                                         | 9.489  | 538.1993 | C26H34O  | 66756-58-9 | 10 Prenol lip-    | -         | -                   | -                   | - |
| POS00310 | 31.4964  | 27.426   | 24.06964 | 22.39117 | 19.33992 | 17.7775  | 277.0355 | 197.1968 | 124.8378 | 96.4246  | 295.3213 | 131.5312 | 23.7501  | 187.0579 | 2.977479 | 0.000761 | 0.00254  | 0.649083 | Isochama(1S,4 $\alpha$ S,7 $\alpha$ S)-7-(((2E                            | 0.797  | 542.1224 | C30H22O  | NA         | 2 -               | -         | -                   | -                   | - |
| POS00311 | 408.4234 | 386.4677 | 337.5129 | 399.8241 | 316.7454 | 385.8055 | 371.7943 | 532.0009 | 589.059  | 476.3401 | 560.1984 | 591.6601 | 372.4631 | 520.1755 | 0.481901 | 0.002798 | 0.007093 | 0.545007 | Echineno(13cis,15cis)-2',3',4',5'                                         | 12.657 | 550.4149 | C40H54O  | NA         | 4 -               | C08592    | ko01110//           | Global anMetabolism |   |
| POS00312 | 524.1001 | 210.7017 | 184.6452 | 151.73   | 422.8029 | 268.0478 | 2020.897 | 1446.67  | 1124.52  | 1064.449 | 1893.853 | 838.3419 | 293.6713 | 1398.122 | 2.251216 | 0.000292 | 0.001291 | 1.671325 | PhosphorPhosphoribide A                                                   | 11.126 | 592.2649 | C35H36N  | 15664-29-6 | 6 -               | C18021    | ko01110//           | Global anMetabolism |   |
| POS00313 | 413.6247 | 238.8792 | 238.773  | 281.8683 | 139.9181 | 214.0325 | 483.3767 | 291.7267 | 318.8828 | 307.3091 | 366.7865 | 388.1348 | 254.516  | 359.3694 | 0.497712 | 0.05011  | 0.079159 | 0.392499 | Auroxant 2-Acetamido-4-(5-an                                              | 11.576 | 600.4148 | C40H56O  | 27785-15-5 | 5 Prenol lip-     | -         | -                   | -                   | - |
| POS00314 | 216.5543 | 105.5662 | 100.2072 | 85.01778 | 188.4361 | 144.4975 | 561.6225 | 375.7394 | 349.9969 | 295.7079 | 630.1414 | 290.7698 | 140.0465 | 417.263  | 1.575051 | 0.001266 | 0.000663 | 0.82521  | Phosphoribide b                                                           | 9.766  | 606.244  | C39H34N  | 20239-99-0 | 6 Tetrapyr-       | -         | -                   | -                   | - |
| POS00315 | 233.1564 | 188.569  | 86.60123 | 143.857  | 212.4283 | 227.8823 | 767.0187 | 993.3702 | 689.3184 | 557.9559 | 1110.047 | 550.3944 | 182.0824 | 778.0174 | 2.095211 | 0.000107 | 0.000637 | 1.25011  | Cepharan(1S,2S,3 $\alpha$ R,4S,5S,9R,                                     | 12.419 | 606.2804 | C37H38N  | 481-49-2   | 12 -              | -         | -                   | -                   | - |
| POS00316 | 245.2418 | 116.7165 | 224.3851 | 219.039  | 101.1834 | 103.2517 | 207.2962 | 491.3179 | 232.0233 | 220.4965 | 534.6513 | 249.3581 | 168.3029 | 322.5239 | 0.938346 | 0.043533 | 0.070472 | 0.5451   | Rutin NP-008131                                                           | 2.014  | 610.1496 | C27H30O  | 153-18-4   | 6 FlavonoidC05625 | ko01100// | BiosyntheMetabolism |                     |   |
| POS00317 | 18.87419 | 7.981249 | 9.305362 | 8.152813 | 12.6743  | 33.55774 | 335.807  | 306.1121 | 271.7911 | 470.1813 | 288.9618 | 182.049  | 15.09094 | 309.1504 | 4.356554 | 1.87E-05 | 0.000211 | 0.861074 | Cyanidin 3-glucogalactoside                                               | 2.364  | 611.153  | C27H31O  | 142562-01- | 13 Flavonoid-     | -         | -                   | -                   | - |
| POS00318 | 34.13643 | 38.45629 | 9.240112 | 17.05809 | 25.42369 | 31.64784 | 252.8423 | 229.3923 | 347.7896 | 217.1361 | 295.9582 | 203.8342 | 25.99378 | 257.8255 | 3.310157 | 1.35E-06 | 3.40E-05 | 0.75639  | Glutathio Epigallocatechin                                                | 0.86   | 612.1489 | C20H32N  | 27025-41-8 | 5 FlavonoidC12136 | ko01110// | BiosyntheMetabolism |                     |   |
| POS00319 | 61.23578 | 32.38861 | 36.60869 | 34.72423 | 81.90498 | 49.04297 | 30.81126 | 24.23178 | 46.83434 | 14.00441 | 23.90342 | 16.7204  | 49.31754 | 26.08427 | -0.91892 | 0.030641 | 0.052734 | 0.213916 | Kanokoside D                                                              | 10.391 | 624.2551 | C27H44O  | 64703-88-4 | 12 Prenol lip-    | -         | -                   | -                   | - |
| POS00320 | 0.589498 | 0.28641  | 0.272166 | 0.268376 | 0.260881 | 0.27817  | 46.3816  | 58.87296 | 34.54469 | 100.8124 | 69.34733 | 92.44574 | 1        | 67.06746 | 0.606754 | 8.63E-05 | 0.000543 | 0.411229 | QuercetinNCGC00385380-021                                                 | 1.913  | 626.1447 | C27H30O  | 42900-82-3 | 5 Flavonoid-      | -         | -                   | -                   | - |
| POS00321 | 6.817182 | 3.636357 | 2.598566 | 2.321796 | 5.860211 | 0.962366 | 43.62523 | 28.09715 | 24.55887 | 9.152912 | 40.66983 | 9.783724 | 3.699413 | 25.98129 | 2.812105 | 0.004297 | 0.009825 | 0.224748 | Ginsenoside Rh1                                                           | 4.088  | 638.4356 | C36H62O  | 63223-86-9 | 5 Prenol lip-     | -         | -                   | -                   | - |
| POS00322 | 1.375682 | 0.489998 | 1.22433  | 0.873806 | 0.258824 | 1.010555 | 39.24405 | 11.0455  | 35.12296 | 19.79816 | 13.36233 | 11.41545 | 1        | 21.66474 | 4.437277 | 0.002235 | 0.005941 | 0.200355 | Rhamneti-3-(((2S,3R,4S,5S,6R)-                                            | 2.276  | 640.1598 | C28H32O  | 259234-17- | 6 Flavonoid-      | -         | -                   | -                   | - |
| POS00323 | 167.0083 | 107.1296 | 123.2664 | 117.4913 | 139.714  | 143.0205 | 136.004  | 137.6904 | 118.3112 | 131.9106 | 176.5777 | 149.4598 | 132.9383 | 141.659  | 0.091665 | 0.48181  | 0.543283 | 0.087643 | Pittoside.-2-[5-[2-[4-[5-[2-[2-[5-                                        | 12.519 | 768.4732 | C41H68O  | 75303-44-5 | 9 -               | -         | -                   | -                   | - |
| POS00324 | 0.51147  | 0.359769 | 0.358201 | 0.298078 | 0.255776 | 0.31296  | 121.1887 | 60.31629 | 34.50587 | 69.97777 | 141.0501 | 76.61033 | 1        | 83.94151 | 6.391312 | 0.000431 | 0.001717 | 0.474646 | Cyanidin 3-glucoside 5-caffeoyl                                           | 2.429  | 772.18   | C36H36O- |            | 6 -               | C16372    | ko00942//           | BiosyntheMetabolism |   |
| POS00325 | 200.1007 | 146.9042 | 149.8563 | 153.4018 | 119.1432 | 246.243  | 525.7871 | 824.1286 | 566.2722 | 309.9272 | 879.688  | 316.274  | 169.2749 | 570.3462 | 1.75247  | 0.00261  | 0.006721 | 0.970632 | Quercetin[Similar to: NP-0081                                             | 1.789  | 772.2009 | C33H40O  | 50867-29-3 | 6 Flavonoid-      | -         | -                   | -                   | - |
| POS00326 | 0.536098 | 0.383079 | 0.407005 | 0.333914 | 0.272916 | 0.34352  | 62.87643 | 40.30318 | 38.78703 | 32.99397 | 63.44936 | 46.19924 | 1        | 47.43487 | 5.567876 | 4.38E-06 | 7.42E-05 | 0.399156 | Kaempferol 3-sophoroside 7-g                                              | 2.576  | 786.1947 | C33H38O  | 140163-56- | 11 -              | -         | -                   | -                   | - |
| POS00327 | 0.509155 | 0.307551 | 0.344268 | 0.277543 | 0.241348 | 0.295539 | 71.24865 | 88.87151 | 75.71025 | 94.07227 | 120.9546 | 85.2026  | 1        | 89.34331 | 6.481288 | 2.19E-07 | 1.02E-05 | 0.497647 | MoracetinNCGC00179992-021                                                 | 1.738  | 788.1961 | C33H40O  | 61474-16-6 | 6 Flavonoid-      | -         | -                   | -                   | - |
