# Supplementary material for: BcMYB111 Responds to BcCBF2 and Induces Flavonol Biosynthesis to Enhance Tolerance under Cold Stress in Non-Heading Chinese Cabbage
Source: MDPI journal article supplement (doi:10.3390/ijms24108670), 2023-05-12
Supplement: s1 [file s1]

Supplementary Table S2 -List of primers used for the gene cloning, vector constructions and qRT-PCR analyses.

| Name                     | Primer sequence (5'-3')                                                                                                                                 |
|--------------------------|---------------------------------------------------------------------------------------------------------------------------------------------------------|
| BcCBF2-F                 | ATGACCTCATTTTCTACCTTTTCTGC                                                                                                                              |
| BcCBF2-R                 | CTAATAACTCCAAGGACACGCTC                                                                                                                                 |
| BcCBF2-AD-F              | gtaccagattagctcatatgATGACCTCATTTTC                                                                                                                      |
| BcCBF2-AD-R              | atggccacccgggtggaatcATAACTCCAA                                                                                                                          |
| BcCBF2-RT-F              | ATGGAGGAGACGATCGTGGA                                                                                                                                    |
| BcCBF2-RT-R              | ACAAGGCCGGCATCTCTTAAC                                                                                                                                   |
| BcCHS-RT-F               | CTGGCTTATGTTGGTTCG                                                                                                                                      |
| BcCHS-RT-R               | CCGAGTCCGGGAAGAATGCTC                                                                                                                                   |
| BcF3H-RT-F               | CGAGCAGACTATCAATAG                                                                                                                                      |
| BcF3H-RT-R               | ATATCTCTACTCATCTTTCTC                                                                                                                                   |
| BcFLS1-RT-F              | CATCTCCCTCCACACCGAAG                                                                                                                                    |
| BcFLS1-RT-R              | TCTTCGTCGGGATCGCTCA                                                                                                                                     |
| BcMYB111-RT-F            | GCCTCACAATGCTCCCA                                                                                                                                       |
| BcMYB111-RT-R            | TACGCTCCCAAGCACTTCC                                                                                                                                     |
| AiF3H-RT-F               | CCGTGAGATCGTGTGAGGCTT                                                                                                                                   |
| AiF3H-RT-R               | AATCTTGCACAGCCTCTCCC                                                                                                                                    |
| AiFLS1-RT-F              | AAGCGAGTGAAGAATGGGG                                                                                                                                     |
| AiFLS1-RT-R              | CCGGTTTAGCCACGGATCTC                                                                                                                                    |
| AiACTIN-R                | CCATTGCTTAATTCCAGCAAAAC                                                                                                                                 |
| AiACTIN-R                | TTGACAATTGATGCAACAATGACG                                                                                                                                |
| BcGAPC-RT-F              | AGAGCCGCTTCTTCAACATCATT                                                                                                                                 |
| BcGAPC-RT-R              | TGGGCACACGGAAGGACATACC                                                                                                                                  |
| BcCBF2-pRII01-F          | tcttcaatgtagcatatgATGACCTCATTTTC                                                                                                                        |
| BcCBF2-pRII01-R          | gacctgtctcaatggatcATAACTCCA                                                                                                                             |
| BcMYB111-pRII01-F        | tcttcaatgtagcatatgATGGGAAGGGC                                                                                                                           |
| BcMYB111-pRII01-R        | gacctgtctcaatggatcTATGCTATCCA                                                                                                                           |
| BcMYB111-pGreenII-0800-F | ctataggccgaattgggtaccATATCCAGTA                                                                                                                         |
| BcMYB111-pGreenII-0800-R | atcgataccgtgactcgagCTCTTCTCTC                                                                                                                           |
| BcFLS1-pGreenII-0800-F   | ctataggccgaattgggtaccGAACCTTACTG                                                                                                                        |
| BcFLS1-pGreenII-0800-R   | atcgataccgtgactcgagACCTTTAGTGA                                                                                                                          |
| BcF3H-pGreenII-0800-F    | ctataggccgaattgggtaccGGCTTATTATG                                                                                                                        |
| BcF3H-pGreenII-0800-R    | atcgataccgtgactcgagTTATAATTAT                                                                                                                           |
| pClod-HIS-BcCBF2-F       | tcggtaccctcaggagatccATGACCTCAT                                                                                                                          |
| pClod-HIS-BcCBF2-R       | agggtgacaacgttgaaatcCTAATAACTC                                                                                                                          |
| BcMYB111-Pro-F           | ATATCCAGTAAATAGTAATATAAT                                                                                                                                |
| BcMYB111-Pro-R           | CATCTCTTCTCTCAAAAAGAGAA                                                                                                                                 |
| BcMYB111-F               | ATGGGAAGGGCTCCTTGTGTGAGA                                                                                                                                |
| BcMYB111-R               | TCATATGCTATCCACTGTCTGATT                                                                                                                                |
| BcMYB111-pCAMBIA1302-F   | acggggagagctggtaccATGGGAAGGGC                                                                                                                           |
| BcMYB111-pCAMBIA1302-R   | tcttactgtgactctagaTATGCTATCCA                                                                                                                           |
| BcMYB111-DRE-pAbAi       | cttgaattgagctggtaacCCACATAAACGCTCTTCATATAAAACATAGCCATTCTCCCGCACTCTACTAGCCATAGAAACATAGCCATTCTCCCGCACTCTACTAGCCATAGACGTTGTGTCCATTGACTCTctgaggcatgtgctgtat |
| BcMYB111-DRE-m-pAbAi     | cttgaattgagctggtaacCCACATAAACGCTCTTCATATAAAACATAGCCATTCTCCCGCACTCTACTAGCCATAGAAACATAGCCATTCTCCCGCACTCTACTAGCCATAGACGTTGTGTCCATTGACTCTctgaggcatgtgctgtat |
| BcMYB111-pJG-F           | gattatgctctccgaattCATGGGAAGGCC                                                                                                                          |
| BcMYB111-pJG-R           | agaagtcacaagctctcgagTATGCTATCCA                                                                                                                         |
| BcCHS-pLaczi-F           | tttgatttggatgggaattCTTAGTTGTGGCACTTAGTTGTTCGCACTTAGTTGTTCGGAAtacagagcaatgctcgag                                                                         |
| BcCHS-pLaczi-R           | ctcgagcatgtgctgtglatTCGCAACAACCTAAGTCGCAACAACCTAAGTCGCAACAACCTAAGGaatccgatccaatatacaa                                                                   |
| BcCHS-m-pLaczi-F         | tttgatttggatgggaattCTTAAAAAAGCGACTTAAAAAAGCGACTTAAAAAAGCGAAtacagagcaatgctcgag                                                                           |
| BcCHS-m-pLaczi-R         | ctcgagcatgtgctgtglatTCCTTTTTTAAGTCCCTTTTTTAAGTCCCTTTTTTAAGGaatccgatccaatatacaa                                                                          |
| BcF3H-pLaczi-F           | tttgatttggatgggaattGGTCCCGAGTAGCTGGTCCCAGGTAGCTGGTCCCAGGTAGCTAtacagagcaatgctcgag                                                                        |
| BcF3H-pLaczi-R           | ctcgagcatgtgctgtglatAGCTACCTGGGACCAGCTACCTGGGACCAGCTACCTGGGACCgaattccgatccaatatacaa                                                                     |
| BcF3H-m-pLaczi-F         | tttgatttggatgggaattGGCCCCCTAGCTGGCCCCCTAGCTGGCCCCCTAGCTAtacagagcaatgctcgag                                                                              |
| BcF3H-m-pLaczi-R         | ctcgagcatgtgctgtglatAGCTAGGGGGGCCAGCTAGGGGGGCCAGCTAGGGGGGGGCCgaattccgatccaatatacaa                                                                      |
| BcFLS1-pLaczi-F          | tttgatttggatgggaattCTGTGTTAGTACTTTGTGGTAGTACTTTGTGCTAGTACTTAtacagagcaatgctcgag                                                                          |
| BcFLS1-pLaczi-R          | ctcgagcatgtgctgtglatAAGTAACCTACCACAAAGTAACCTACCACAAAGTAACCTACCAGaatccgatccaatatacaa                                                                     |
| BcFLS1-m-pLaczi-F        | tttgatttggatgggaattTGTAAAAAAACTTTGTAAAAAAACTTTGTAAAAAAACTTAtacagagcaatgctcgag                                                                           |
| BcFLS1-m-pLaczi-R        | ctcgagcatgtgctgtglatAAGTTTTTTTACAAAGTTTTTTTACAAAGTTTTTTTACAAAGTTTTTTTACgaattccgatccaatatacaa                                                            |
| BcMYB111-EMSA-F          | CATTCTCGCGCACTACTACTATTCTCGCCGACTCTACTA                                                                                                                 |
| BcMYB111-EMSA-R          | TAGTAGAGTCGGCGAGAATGTAGTAGAGTCGGCGAGAATG                                                                                                                |
| BcMYB111-m-EMSA-F        | CATTCTCAAAAACTACTACTCTCAAAAAATCTACTA                                                                                                                    |
| BcMYB111-m-EMSA-R        | TAGTAGATTTTTTGAGAAATGTAGTAGATTTTTTGTAGAATG                                                                                                              |
| GFP-R                    | GTGCAGATGAACCTCAGGGTCA                                                                                                                                  |
